# Supplementary material
Source: Copernicus journal article supplement (doi:10.5194/bg-23-3655-2026)
Supplement: Supplementary file 1 [file bg-23-3655-2026-supplement.pdf]

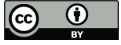

*Supplement of*

## **The impact of essential climate variables on respiration rates in subpolar and polar planktonic foraminifera**

**Diane V. Armitage et al.**

*Correspondence to:* Diane V. Armitage ([d.armitage1@universityofgalway.ie](mailto:d.armitage1@universityofgalway.ie)) and Audrey Morley ([audrey.morley@universityofgalway.ie](mailto:audrey.morley@universityofgalway.ie))

The copyright of individual parts of the supplement might differ from the article licence.

## Supplementary Tables

Supplementary Table S1: Correlation Table between Respiration rates and ECV  
 Supplementary Table S2: Principal Component Analysis (PCA)  
 Supplementary Table S3: Principal component Loadings  
 Supplementary Table S4: Principal Component Regression (PCR)  
 Supplementary Figure S1: Regression between PCA's and respiration rates for *N. pachyderma*  
 Supplementary Figure S2: Regression between PCA's and respiration rates for *N. incompta*  
 Supplementary Table S5: Partial Least Squares Regression (PLSR)  
 Supplementary Table S6: Redundancy Analysis (RDA)  
 Supplementary Table S7: Summary of model performance vs Null Model  
 Supplementary Table S8: Source data for Figure 3  
 Supplementary Table S9: Source Data for Figures 5 and 6  
 Supplementary Table S10: Source Data for Figure 5 and 6  
 Supplementary Table S11: Source Data for Figure 7  
 Supplementary Table S12: Source Data for Figure 8

**Table S1:** Quantification of the correlation between size-normalised respiration, essential climate variables and nutrients in *N. incompta*. PO<sub>4</sub><sup>3-</sup>=Phosphate; Sal=salinity; Turb=Turbidity; Fluo=Fluorescence; DIC = Dissolved Inorganic Carbon; DO= Dissolved Oxygen; SNR=Size Normalised Respiration; Temp=Temperature, Alk = Alkalinity.

|                               | TON    | PO <sub>4</sub> <sup>3-</sup> | Sal    | Turb   | Fluo.  | DIC    | DO     | SNR    | Temp   | Alk    | pH     | Ω <sub>Ca</sub> |
|-------------------------------|--------|-------------------------------|--------|--------|--------|--------|--------|--------|--------|--------|--------|-----------------|
| TON                           |        | 0.99*                         | 0.16   | -0.99* | 0.34   | 0.83*  | -0.57  | -0.10  | -0.87* | -0.91* | -0.34  | -0.77*          |
| PO <sub>4</sub> <sup>3-</sup> | 0.99*  |                               | 0.20   | -0.99* | 0.37   | 0.85*  | -0.59  | -0.07  | -0.85* | -0.89* | -0.37  | -0.79*          |
| Sal                           | 0.17   | 0.20                          |        | -0.34  | 0.98*  | 0.69*  | -0.91* | 0.83*  | 0.34   | 0.26   | -0.98* | -0.76*          |
| Turb                          | -0.99* | -0.99*                        | -0.34  |        | -0.50  | -0.91* | 0.70*  | -0.05  | 0.77*  | 0.82*  | 0.50   | 0.87*           |
| Fluo.                         | 0.34   | 0.37                          | 0.98*  | 0.50   |        | 0.81*  | -0.97* | 0.78*  | 0.17   | 0.09   | -1.00* | -0.87*          |
| DIC                           | 0.83*  | 0.85*                         | 0.69*  | -0.91* | 0.81*  |        | -0.93* | 0.40   | -0.44  | -0.51  | -0.81* | -0.99*          |
| DO                            | -0.57  | -0.59*                        | -0.91* | 0.70*  | -0.97* | -0.93* |        | -0.65* | 0.08   | 0.16   | 0.97*  | 0.96*           |
| SNR                           | -0.10  | -0.07                         | 0.83*  | -0.05  | 0.78*  | 0.40   | -0.65* |        | 0.51 * | 0.45   | -0.78* | -0.48           |
| Temp                          | -0.87* | -0.85*                        | 0.34   | 0.77*  | 0.17   | -0.44  | 0.08   | 0.51   |        | 0.99*  | -0.17  | 0.35            |
| Alk                           | -0.91* | -0.89*                        | 0.26   | 0.82*  | 0.09   | -0.51  | 0.17   | 0.45   | 0.99*  |        | -0.09  | 0.42            |
| pH                            | -0.34  | -0.37                         | -0.98* | 0.50   | -1.00* | -0.81* | 0.97*  | -0.78* | -0.17  | -0.09  |        | 0.87*           |
| Ω <sub>Ca</sub>               | -0.77* | -0.79*                        | -0.76* | 0.87*  | -0.87* | -0.99* | 0.97*  | -0.48  | 0.35   | 0.42   | 0.87*  |                 |

**Table S2. Principal Component Analysis (PCA)**

| Environmental dataset | Component | Eigenvalue | % Variance | Cumulative % |
|-----------------------|-----------|------------|------------|--------------|
| <i>N. pachyderma</i>  | PC1       | 4.70       | 43         | 43           |
|                       | PC2       | 3.01       | 27         | 70           |
|                       | PC3       | 1.81       | 16         | 87           |
|                       | PC4       | 0.97       | 3          | 99           |
| <i>N. incompta</i>    | PC1       | 6.61       | 60         | 60           |
|                       | PC2       | 4.39       | 40         | 100          |

**Table S3. Principal Component Loadings**

| Environmental dataset | Variable         | PC1   | PC2   | PC3   | PC4   |
|-----------------------|------------------|-------|-------|-------|-------|
| <i>N. pachyderma</i>  | Temperature      | 0.35  | -0.08 | 0.26  | -0.53 |
|                       | Salinity         | 0.22  | -0.39 | 0.25  | -0.34 |
|                       | Alkalinity       | 0.15  | -0.46 | -0.03 | 0.50  |
|                       | pH               | 0.19  | -0.46 | -0.30 | 0.01  |
|                       | Oxygen           | 0.34  | 0.22  | 0.34  | 0.09  |
|                       | Fluorescence     | 0.06  | 0.01  | 0.61  | 0.54  |
|                       | PO <sub>4</sub>  | -0.35 | -0.21 | 0.34  | -0.22 |
|                       | TON              | 0.38  | -0.18 | 0.32  | -0.09 |
|                       | SiO <sub>2</sub> | -0.39 | -0.21 | 0.16  | -0.03 |
|                       | DIC              | -0.38 | -0.24 | -0.19 | 0.04  |
| ΩCa                   | 0.29             | -0.43 | -0.02 | 0.04  |       |
| <i>N. incompta</i>    | Temperature      | -0.19 | 0.41  |       |       |
|                       | Salinity         | 0.25  | 0.37  |       |       |
|                       | Alkalinity       | -0.22 | 0.39  |       |       |
|                       | pH               | -0.3  | -0.31 |       |       |
|                       | Oxygen           | -0.35 | -0.2  |       |       |
|                       | Fluorescence     | 0.30  | 0.31  |       |       |
|                       | PO <sub>4</sub>  | 0.34  | -0.23 |       |       |
|                       | TON              | 0.34  | -0.24 |       |       |
|                       | SiO <sub>2</sub> | -0.14 | 0.44  |       |       |
|                       | DIC              | 0.39  | 0.03  |       |       |
| ΩCa                   | -0.38            | -0.08 |       |       |       |

**Table S4. Principal Component Regression (PCR)**

| SNR <i>N. pachyderma</i> | Estimate | Std. Error | t     | p     | Adjusted R2 |
|--------------------------|----------|------------|-------|-------|-------------|
| Intercept                | 54.43    | 2.7        | 20.86 | <0.01 | -0.011      |
| PC1                      | -0.31    | 1.26       | -0.25 | 0.81  |             |
| PC2                      | -1.38    | 1.57       | -0.87 | 0.38  |             |
| PC3                      | 0.13     | 2.03       | 0.07  | 0.95  |             |
| PC4                      | -4.38    | 2.78       | -1.58 | 0.12  |             |
| SNR <i>N. incompta</i>   | Estimate | Std. Error | t     | p     |             |
| Intercept                | 219.6    | 7.62       | 28.8  | <0.01 | 0.73        |
| PC1                      | 11.14    | 3.03       | 3.68  | <0.01 |             |
| PC2                      | 30.47    | 3.71       | 8.2   | <0.01 |             |

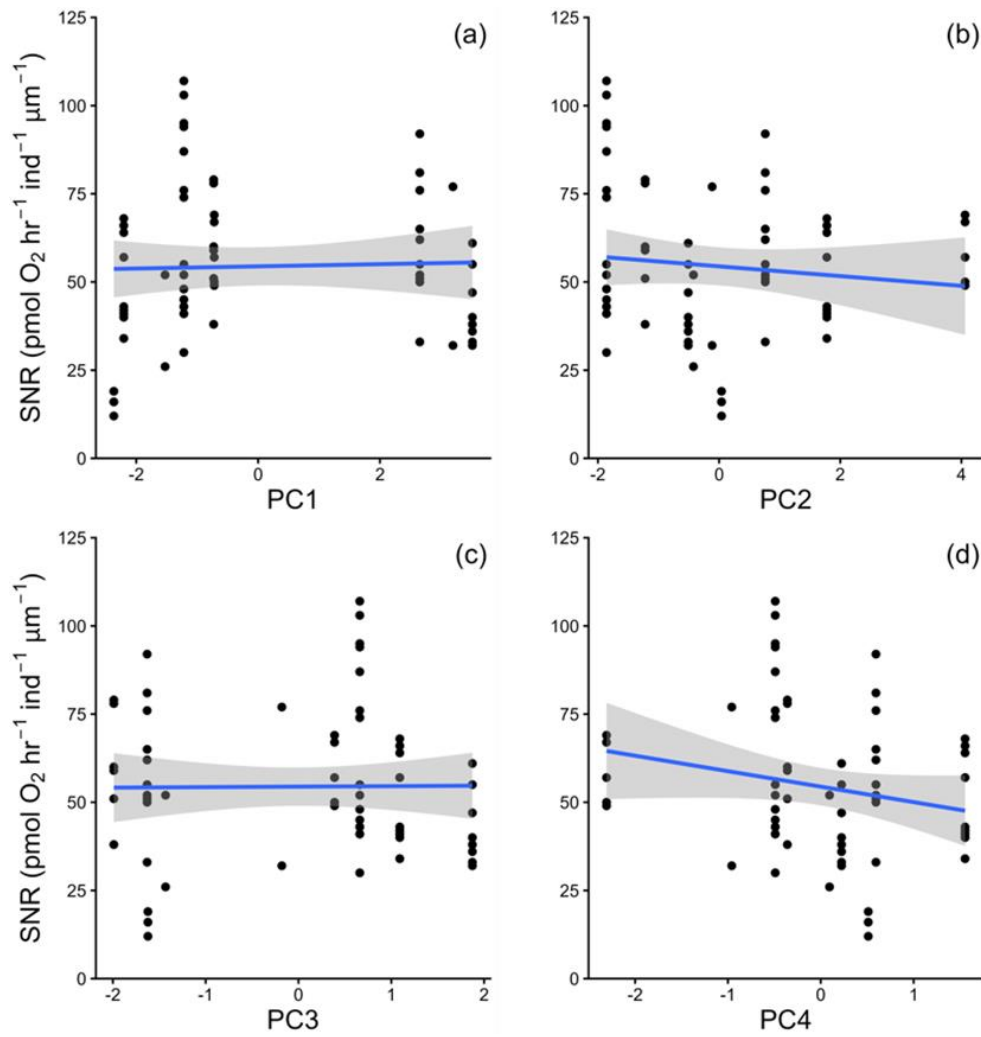

**Figure S1:** Regressions between the four principal components describing the environmental variables for the *N. pachyderma* dataset and size-normalized respiration rates of *N. pachyderma*.

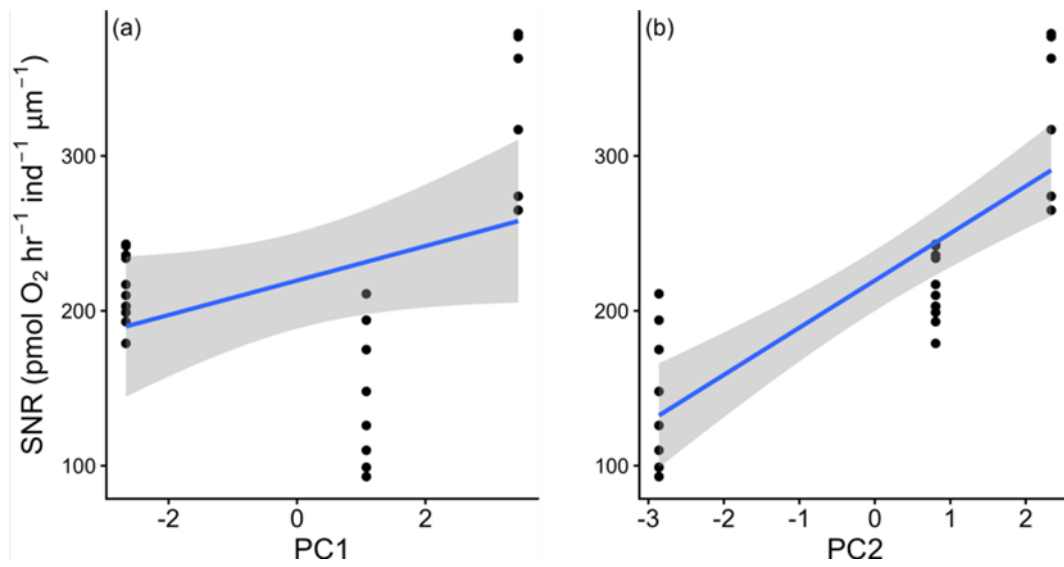

**Figure S2:** Regressions between the two principal components describing the environmental variables for the *N. incompta* dataset and size-normalized respiration rates of *N. incompta*.

**Table S5. Partial Least Squares regression (PLSR)**

| SNR <i>N. pachyderma</i> | X Variance % | Y Variance % | RMSEP | 95 % CI of coefficients |
|--------------------------|--------------|--------------|-------|-------------------------|
| PC1                      | 41.97        | 2.58         | 21.60 | (1.79, 6.33)            |
| PC2                      | 99.06        | 3.13         | 21.98 | (-0.38, 0.35)           |
| PC3                      | 99.57        | 25.08        | 20.03 | (-0.73, 0.07)           |
| PC4                      | 99.96        | 25.51        | 19.66 | (-0.12, 1.01)           |
| SNR <i>N. incompta</i>   | X Variance % | Y Variance % | RMSEP | 95 % CI of coefficients |
| PC1                      | 98.45        | 18.59        | 74.44 | (4.85, 17.32)           |
| PC2                      | 100          | 78.61        | 41.53 | (121.92, 38.51)         |

**Table S6. Redundancy Analysis (RDA)**

| SNR <i>N. pachyderma</i>     | Df | Variance     | F     | p-value |
|------------------------------|----|--------------|-------|---------|
| Constrained (by Environment) | 8  | 169.42       | 3.97  | 0.001   |
| Residual                     | 54 | 288.19       | -     | -       |
| SNR <i>N. incompta</i>       | Df | Variance     | F     | p-value |
| Constrained (by Environment) | 2  | 4893.4       | 40.42 | 0.001   |
| Residual                     | 22 | 1263.31331.6 | -     | -       |

**Table S7. Summary of model performance vs Null Model**

| <i>N. pachyderma</i> | Explained variance | RMSEP | 95% CI             | Significance vs null |
|----------------------|--------------------|-------|--------------------|----------------------|
| PCR                  | 5.43%              | 19.63 | -                  | NS                   |
| PLSR                 | 25.5%              | 19.66 | overlaps 0         | NS                   |
| RDA                  | 37.02%             |       | -                  | p < 0.001            |
| <i>N. incompta</i>   | Explained variance | RMSEP | 95% CI             | Significance vs null |
| PCR                  | 78.6%              | 41.24 | -                  | p < 0.001            |
| PLSR                 | 78.6%              | 41.53 | Does not overlap 0 | p < 0.001            |
| RDA                  | 78.6%              | -     | -                  | p < 0.001            |

**Table S8:** Source Data for Figure 3:

| Source                 | Species               | $\sqrt[3]{\text{cavity volume}}$<br>[ $\mu\text{m}$ ] | Max $\emptyset$<br>[ $\mu\text{m}$ ] |
|------------------------|-----------------------|-------------------------------------------------------|--------------------------------------|
| <i>This study</i>      | <i>N. incompta</i>    | 156.42                                                | 297.34                               |
| <i>This study</i>      | <i>N. incompta</i>    | 148.64                                                | 284.89                               |
| <i>This study</i>      | <i>N. incompta</i>    | 161.29                                                | 291.37                               |
| <i>This study</i>      | <i>N. incompta</i>    | 119.19                                                | 196.54                               |
| <i>This study</i>      | <i>N. incompta</i>    | 90.67                                                 | 168.36                               |
| (Burke <i>et al.</i> ) | <i>N. incompta</i>    | 145.85                                                | 272.67                               |
| (Burke <i>et al.</i> ) | <i>N. incompta</i>    | 177.16                                                | 349.08                               |
| (Burke <i>et al.</i> ) | <i>N. incompta</i>    | 165.56                                                | 304.45                               |
| (Burke <i>et al.</i> ) | <i>N. incompta</i>    | 178.36                                                | 314.45                               |
| (Burke <i>et al.</i> ) | <i>N. incompta</i>    | 148.83                                                | 264.32                               |
| (Burke <i>et al.</i> ) | <i>N. incompta</i>    | 165.58                                                | 306.85                               |
| (Burke <i>et al.</i> ) | <i>N. incompta</i>    | 181.00                                                | 314.37                               |
| (Burke <i>et al.</i> ) | <i>N. incompta</i>    | 173.84                                                | 306.12                               |
| <i>This study</i>      | <i>N. pachyderma</i>  | 138.82                                                | 261.02                               |
| <i>This study</i>      | <i>N. pachyderma</i>  | 86.34                                                 | 165.48                               |
| <i>This study</i>      | <i>N. pachyderma</i>  | 99.12                                                 | 178.24                               |
| <i>This study</i>      | <i>N. pachyderma</i>  | 111.57                                                | 201.36                               |
| <i>This study</i>      | <i>N. pachyderma</i>  | 118.50                                                | 227.1                                |
| <i>This study</i>      | <i>N. pachyderma</i>  | 153.20                                                | 264.08                               |
| <i>This study</i>      | <i>N. pachyderma</i>  | 148.15                                                | 277.63                               |
| <i>This study</i>      | <i>N. pachyderma</i>  | 138.69                                                | 236.06                               |
| <i>This study</i>      | <i>N. pachyderma</i>  | 119.88                                                | 210.64                               |
| (Burke <i>et al.</i> ) | <i>N. pachyderma</i>  | 170.76                                                | 300.04                               |
| (Burke <i>et al.</i> ) | <i>N. pachyderma</i>  | 135.99                                                | 255.31                               |
| (Burke <i>et al.</i> ) | <i>N. pachyderma</i>  | 129.12                                                | 215.57                               |
| (Burke <i>et al.</i> ) | <i>N. pachyderma</i>  | 125.67                                                | 223.08                               |
| (Burke <i>et al.</i> ) | <i>N. pachyderma</i>  | 147.33                                                | 242.14                               |
| (Burke <i>et al.</i> ) | <i>N. pachyderma</i>  | 167.47                                                | 265.99                               |
| (Burke <i>et al.</i> ) | <i>N. pachyderma</i>  | 171.11                                                | 290.05                               |
| <i>This study</i>      | <i>T. quinqueloba</i> | 77.93                                                 | 146.54                               |
| <i>This study</i>      | <i>T. quinqueloba</i> | 82.85                                                 | 157.97                               |
| <i>This study</i>      | <i>T. quinqueloba</i> | 139.79                                                | 237.58                               |
| <i>This study</i>      | <i>T. quinqueloba</i> | 72.76                                                 | 136.91                               |
| <i>This study</i>      | <i>T. quinqueloba</i> | 119.57                                                | 217.52                               |
| <i>This study</i>      | <i>T. quinqueloba</i> | 76.29                                                 | 149.09                               |
| <i>This study</i>      | <i>T. quinqueloba</i> | 132.51                                                | 245                                  |
| (Burke <i>et al.</i> ) | <i>T. quinqueloba</i> | 109.30                                                | 197.82                               |
| (Burke <i>et al.</i> ) | <i>T. quinqueloba</i> | 112.76                                                | 206.68                               |
| (Burke <i>et al.</i> ) | <i>T. quinqueloba</i> | 144.25                                                | 263.33                               |

**Table S9:** Source Data for Figures 5 and 6. Abbreviations: Temp=Temperature; Alk = Alkalinity; DIC = Dissolved Inorganic Carbon; TON= Total Oxidized Nitrogen; PO<sub>4</sub><sup>3-</sup>=Phosphate; SiO<sub>2</sub>=silicon dioxide; Sal=salinity; Turb=Turbidity; Fluo=Fluorescence; DO= Dissolved Oxygen.

| Taxon                | St.  | Lat   | Long   | Depth | Temp | pH   | Ω <sub>c</sub> | Alk  | DIC  | TON                      | PO <sub>4</sub> | SiO <sub>2</sub> | Sal   | Turb | Fluo. | DO                    |
|----------------------|------|-------|--------|-------|------|------|----------------|------|------|--------------------------|-----------------|------------------|-------|------|-------|-----------------------|
|                      |      |       |        | [m]   | [°C] |      |                |      |      | [μmol Kg <sup>-1</sup> ] |                 |                  | [PSU] |      |       | [ml L <sup>-1</sup> ] |
| <i>N. incompta</i>   | S1   | 55.65 | -14.01 | 40    | 13   | 7.98 | 2.8            | 2309 | 2138 | 3.6                      | 0.29            | 1.24             | 35.45 | 0.11 | 0.14  | 2.51                  |
| <i>N. pachyderma</i> | S2   | 71.63 | -8.42  | 50    | 1    | 7.93 | 1.72           | 2276 | 2156 | 8.51                     | 0.69            | 4.36             | 34.58 | 0.12 | 0.25  | 2.52                  |
| <i>N. pachyderma</i> | S8.1 | 74.25 | -10.07 | 75    | 3.5  | 8.12 | 2.66           | 2300 | 2172 | 5.95                     | 0.52            | 2.66             | 34.92 | 0.11 | 0.07  | 2.31                  |
| <i>N. pachyderma</i> | S10  | 70.50 | -17.94 | 100   | 0.5  | 8.07 | 2.28           | 2293 | 2158 | 9.44                     | 0.62            | 4.45             | 34.57 | 0.11 | 0.07  | 2.36                  |
| <i>N. pachyderma</i> | S11  | 67.87 | -21.77 | 125   | 2.5  | 8.06 | 2.46           | 2298 | 2169 | 7.95                     | 0.55            | 3.63             | 34.76 | 0.11 | 0.08  | 2.37                  |
| <i>N. pachyderma</i> | S12  | 65.42 | -28.33 | 20    | 10   | 8.08 | 3.52           | 2317 | 2110 | 5.1                      | 0.4             | 0.99             | 35.09 | 0.13 | 0.26  | 2.66                  |
| <i>N. incompta</i>   | S16  | 62.75 | -37.51 | 20    | 10   | 8.09 | 3.5            | 2305 | 2112 | 4.37                     | 0.33            | 0.83             | 34.96 | 0.11 | 0.09  | 2.61                  |
| <i>N. pachyderma</i> | S17  | 60.18 | -39.12 | 50    | 6    | 8.09 | 3.24           | 2299 | 2168 | 9.44                     | 0.89            | 5.59             | 34.91 | 0.12 | 0.15  | 2.47                  |
| <i>N. pachyderma</i> | S18  | 58.25 | -45.64 | 45    | 7.5  | 7.89 | 1.22           | 2185 | 2129 | 6.11                     | 0.58            | 2.51             | 34.66 | 0.12 | 0.08  | 2.57                  |
| <i>N. pachyderma</i> | S19  | 57.55 | -48.52 | 35    | 6    | 8.11 | 3.36           | 2296 | 2134 | 0.73                     | 0.1             | 1.28             | 34.7  | 0.12 | 0.11  | 2.61                  |
| <i>N. incompta</i>   | S20  | 56.36 | -27.89 | 10    | 14   | 8.09 | 4.1            | 2311 | 2080 | 0.73                     | 0.1             | 1.28             | 35.04 | 0.14 | 0.09  | 2.64                  |

**Table S10:** Source Data for Figure 5 and 6. Note that all respiration rates are blank corrected and meet the limit of quantification. Standard deviations (SD) are derived from triplicate measurements of each experiment

| Species              | Station /Lab | Temp [°C] | Max Ø [µm] | $\sqrt[3]{\text{Cavity Volume}}$ [µm] | Respiration Rate (LOQ*) [pmol O <sub>2</sub> hr <sup>-1</sup> ind <sup>-1</sup> ] | SD ± 1σ | SNR [pmol O <sub>2</sub> hr <sup>-1</sup> ind <sup>-1</sup> µm <sup>-1</sup> ] | Log10 SNR |
|----------------------|--------------|-----------|------------|---------------------------------------|-----------------------------------------------------------------------------------|---------|--------------------------------------------------------------------------------|-----------|
| <i>N. incompta</i>   | S1           | 13        | 205        | 114.42                                | 321.73                                                                            | 12.89   | 376.59                                                                         | 2.58      |
| <i>N. incompta</i>   | S1           | 13        | 230        | 128.42                                | 253.77                                                                            | 2.80    | 264.66                                                                         | 2.42      |
| <i>N. incompta</i>   | S1           | 13        | 242        | 135.14                                | 366.21                                                                            | 2.64    | 362.93                                                                         | 2.56      |
| <i>N. incompta</i>   | S1           | 13        | 260        | 145.22                                | 411.21                                                                            | 1.90    | 379.24                                                                         | 2.58      |
| <i>N. incompta</i>   | S1           | 13        | 273        | 152.50                                | 311.54                                                                            | 8.09    | 273.60                                                                         | 2.44      |
| <i>N. incompta</i>   | S1           | 13        | 286        | 159.78                                | 378.03                                                                            | 19.52   | 316.87                                                                         | 2.50      |
| <i>N. incompta</i>   | S16          | 10        | 211        | 117.78                                | 96.49                                                                             | 2.31    | 109.72                                                                         | 2.04      |
| <i>N. incompta</i>   | S16          | 10        | 226        | 126.18                                | 118.34                                                                            | 4.53    | 125.61                                                                         | 2.10      |
| <i>N. incompta</i>   | S16          | 10        | 228        | 127.30                                | 200.19                                                                            | 11.70   | 210.62                                                                         | 2.32      |
| <i>N. incompta</i>   | S16          | 10        | 232        | 129.54                                | 95.35                                                                             | 3.03    | 98.58                                                                          | 1.99      |
| <i>N. incompta</i>   | S16          | 10        | 238        | 132.90                                | 92.13                                                                             | 3.40    | 92.84                                                                          | 1.97      |
| <i>N. incompta</i>   | S16          | 10        | 238        | 132.90                                | 173.96                                                                            | 7.86    | 175.31                                                                         | 2.24      |
| <i>N. incompta</i>   | S16          | 10        | 241        | 134.58                                | 149.19                                                                            | 6.89    | 148.47                                                                         | 2.17      |
| <i>N. incompta</i>   | S16          | 10        | 255        | 142.42                                | 206.28                                                                            | 7.61    | 193.98                                                                         | 2.29      |
| <i>N. incompta</i>   | S20          | 14        | 180        | 100.42                                | 144.38                                                                            | 4.80    | 192.56                                                                         | 2.28      |
| <i>N. incompta</i>   | S20          | 14        | 181        | 100.98                                | 149.89                                                                            | 6.36    | 198.81                                                                         | 2.30      |
| <i>N. incompta</i>   | S20          | 14        | 194        | 108.26                                | 195.34                                                                            | 14.26   | 241.66                                                                         | 2.38      |
| <i>N. incompta</i>   | S20          | 14        | 211        | 117.78                                | 184.68                                                                            | 1.06    | 210.01                                                                         | 2.32      |
| <i>N. incompta</i>   | S20          | 14        | 239        | 133.46                                | 178.74                                                                            | 6.25    | 179.37                                                                         | 2.25      |
| <i>N. incompta</i>   | S20          | 14        | 254        | 141.86                                | 257.87                                                                            | 8.51    | 243.46                                                                         | 2.39      |
| <i>N. incompta</i>   | S20          | 14        | 266        | 148.58                                | 261.54                                                                            | 12.71   | 235.75                                                                         | 2.37      |
| <i>N. incompta</i>   | S20          | 14        | 270        | 150.82                                | 228.16                                                                            | 12.75   | 202.61                                                                         | 2.31      |
| <i>N. incompta</i>   | S20          | 14        | 271        | 151.38                                | 245.77                                                                            | 4.71    | 217.44                                                                         | 2.34      |
| <i>N. incompta</i>   | S20          | 14        | 278        | 155.30                                | 235.91                                                                            | 9.54    | 203.45                                                                         | 2.31      |
| <i>N. incompta</i>   | S20          | 14        | 287        | 160.34                                | 279.62                                                                            | 2.44    | 233.57                                                                         | 2.37      |
| <i>N. pachyderma</i> | Lab          | 2         | 179        | 99.86                                 | 28.73                                                                             | 1.66    | 33.19                                                                          | 1.52      |
| <i>N. pachyderma</i> | Lab          | 2         | 190        | 106.02                                | 22.76                                                                             | 1.61    | 24.77                                                                          | 1.39      |
| <i>N. pachyderma</i> | Lab          | 2         | 190        | 106.02                                | 60.31                                                                             | 0.41    | 65.63                                                                          | 1.82      |
| <i>N. pachyderma</i> | Lab          | 2         | 207        | 115.54                                | 45.19                                                                             | 5.28    | 45.12                                                                          | 1.65      |
| <i>N. pachyderma</i> | Lab          | 2         | 260        | 145.22                                | 94.56                                                                             | 3.25    | 75.12                                                                          | 1.88      |
| <i>N. pachyderma</i> | Lab          | 2         | 264        | 147.46                                | 69.60                                                                             | 2.50    | 54.45                                                                          | 1.74      |
| <i>N. pachyderma</i> | Lab          | 2         | 270        | 150.82                                | 119.76                                                                            | 2.10    | 91.61                                                                          | 1.96      |
| <i>N. pachyderma</i> | Lab          | 2         | 317        | 177.14                                | 144.09                                                                            | 7.64    | 93.85                                                                          | 1.97      |
| <i>N. pachyderma</i> | Lab          | 5         | 126        | 70.18                                 | 12.64                                                                             | 1.42    | 20.78                                                                          | 1.32      |
| <i>N. pachyderma</i> | Lab          | 5         | 150        | 83.62                                 | 34.11                                                                             | 0.91    | 47.06                                                                          | 1.67      |
| <i>N. pachyderma</i> | Lab          | 5         | 160        | 89.22                                 | 22.16                                                                             | 0.25    | 28.65                                                                          | 1.46      |
| <i>N. pachyderma</i> | Lab          | 5         | 181        | 100.98                                | 45.52                                                                             | 0.27    | 52.00                                                                          | 1.72      |
| <i>N. pachyderma</i> | Lab          | 5         | 190        | 106.02                                | 40.00                                                                             | 0.97    | 43.52                                                                          | 1.64      |
| <i>N. pachyderma</i> | Lab          | 5         | 190        | 106.02                                | 50.43                                                                             | 1.88    | 54.88                                                                          | 1.74      |
| <i>N. pachyderma</i> | Lab          | 5         | 198        | 110.50                                | 38.11                                                                             | 0.59    | 39.79                                                                          | 1.60      |
| <i>N. pachyderma</i> | Lab          | 5         | 203        | 113.30                                | 38.39                                                                             | 0.88    | 39.09                                                                          | 1.59      |
| <i>N. pachyderma</i> | Lab          | 5         | 205        | 114.42                                | 59.00                                                                             | 0.96    | 59.49                                                                          | 1.77      |
| <i>N. pachyderma</i> | Lab          | 5         | 208        | 116.10                                | 58.34                                                                             | 2.10    | 57.97                                                                          | 1.76      |
| <i>N. pachyderma</i> | Lab          | 5         | 217        | 121.14                                | 85.02                                                                             | 2.61    | 80.96                                                                          | 1.91      |
| <i>N. pachyderma</i> | Lab          | 5         | 218        | 121.70                                | 58.86                                                                             | 0.95    | 55.80                                                                          | 1.75      |
| <i>N. pachyderma</i> | Lab          | 5         | 223        | 124.50                                | 48.00                                                                             | 0.55    | 44.48                                                                          | 1.65      |
| <i>N. pachyderma</i> | Lab          | 5         | 229        | 127.86                                | 91.07                                                                             | 3.05    | 82.18                                                                          | 1.91      |
| <i>N. pachyderma</i> | Lab          | 5         | 233        | 130.10                                | 88.34                                                                             | 2.94    | 78.34                                                                          | 1.89      |
| <i>N. pachyderma</i> | Lab          | 5         | 234        | 130.66                                | 84.99                                                                             | 6.14    | 75.04                                                                          | 1.88      |
| <i>N. pachyderma</i> | Lab          | 5         | 247        | 137.94                                | 77.05                                                                             | 2.16    | 64.44                                                                          | 1.81      |
| <i>N. pachyderma</i> | Lab          | 5         | 283        | 158.10                                | 156.67                                                                            | 2.65    | 114.32                                                                         | 2.06      |
| <i>N. pachyderma</i> | Lab          | 5         | 298        | 166.50                                | 116.97                                                                            | 1.91    | 81.04                                                                          | 1.91      |
| <i>N. pachyderma</i> | Lab          | 8         | 110        | 61.22                                 | 34.00                                                                             | 1.26    | 64.06                                                                          | 1.81      |
| <i>N. pachyderma</i> | Lab          | 8         | 117        | 65.14                                 | 41.81                                                                             | 1.20    | 74.04                                                                          | 1.87      |
| <i>N. pachyderma</i> | Lab          | 8         | 122        | 67.94                                 | 33.28                                                                             | 0.90    | 56.51                                                                          | 1.75      |
| <i>N. pachyderma</i> | Lab          | 8         | 133        | 74.10                                 | 34.23                                                                             | 1.35    | 53.29                                                                          | 1.73      |
| <i>N. pachyderma</i> | Lab          | 8         | 137        | 76.34                                 | 26.54                                                                             | 0.34    | 40.10                                                                          | 1.60      |
| <i>N. pachyderma</i> | Lab          | 8         | 138        | 76.90                                 | 39.29                                                                             | 0.72    | 58.94                                                                          | 1.77      |
| <i>N. pachyderma</i> | Lab          | 8         | 142        | 79.14                                 | 63.58                                                                             | 0.86    | 92.69                                                                          | 1.97      |
| <i>N. pachyderma</i> | Lab          | 8         | 151        | 84.18                                 | 38.30                                                                             | 0.80    | 52.50                                                                          | 1.72      |
| <i>N. pachyderma</i> | Lab          | 8         | 156        | 86.98                                 | 24.40                                                                             | 1.28    | 32.36                                                                          | 1.51      |
| <i>N. pachyderma</i> | Lab          | 8         | 160        | 89.22                                 | 38.74                                                                             | 3.38    | 50.09                                                                          | 1.70      |

| Species              | Station /Lab | Temp<br>[°C] | Max Ø<br>[µm] | $\sqrt[3]{\text{Cavity Volume}}$<br>[µm] | Respiration Rate (LOQ*)<br>[pmol O <sub>2</sub> hr <sup>-1</sup> ind <sup>-1</sup> ] | SD<br>± 1σ | SNR<br>[pmol O <sub>2</sub> hr <sup>-1</sup> ind <sup>-1</sup> µm <sup>-1</sup> ] | Log10 SNR |
|----------------------|--------------|--------------|---------------|------------------------------------------|--------------------------------------------------------------------------------------|------------|-----------------------------------------------------------------------------------|-----------|
| <i>N. pachyderma</i> | Lab          | 8            | 163           | 90.90                                    | 52.77                                                                                | 0.95       | 66.98                                                                             | 1.83      |
| <i>N. pachyderma</i> | Lab          | 8            | 166           | 92.58                                    | 59.34                                                                                | 1.92       | 73.94                                                                             | 1.87      |
| <i>N. pachyderma</i> | Lab          | 8            | 183           | 102.10                                   | 90.16                                                                                | 0.59       | 101.88                                                                            | 2.01      |
| <i>N. pachyderma</i> | Lab          | 8            | 190           | 106.02                                   | 98.54                                                                                | 0.51       | 107.23                                                                            | 2.03      |
| <i>N. pachyderma</i> | Lab          | 8            | 210           | 117.22                                   | 73.38                                                                                | 1.66       | 72.22                                                                             | 1.86      |
| <i>N. pachyderma</i> | Lab          | 13           | 120           | 66.82                                    | 45.86                                                                                | 0.48       | 79.18                                                                             | 1.90      |
| <i>N. pachyderma</i> | Lab          | 13           | 123           | 68.50                                    | 59.01                                                                                | 0.73       | 99.38                                                                             | 2.00      |
| <i>N. pachyderma</i> | Lab          | 13           | 155           | 86.42                                    | 88.71                                                                                | 0.67       | 118.42                                                                            | 2.07      |
| <i>N. pachyderma</i> | Lab          | 13           | 157           | 87.54                                    | 71.09                                                                                | 2.55       | 93.68                                                                             | 1.97      |
| <i>N. pachyderma</i> | Lab          | 13           | 160           | 89.22                                    | 95.16                                                                                | 0.56       | 123.05                                                                            | 2.09      |
| <i>N. pachyderma</i> | S2           | 1            | 176           | 98.18                                    | 57.36                                                                                | 4.23       | 67.40                                                                             | 1.83      |
| <i>N. pachyderma</i> | S2           | 1            | 178           | 99.30                                    | 35.17                                                                                | 2.80       | 40.86                                                                             | 1.61      |
| <i>N. pachyderma</i> | S2           | 1            | 189           | 105.46                                   | 38.95                                                                                | 0.57       | 42.61                                                                             | 1.63      |
| <i>N. pachyderma</i> | S2           | 1            | 197           | 109.94                                   | 32.09                                                                                | 0.59       | 33.67                                                                             | 1.53      |
| <i>N. pachyderma</i> | S2           | 1            | 199           | 111.06                                   | 38.47                                                                                | 2.06       | 39.97                                                                             | 1.60      |
| <i>N. pachyderma</i> | S2           | 1            | 204           | 113.86                                   | 63.06                                                                                | 1.17       | 63.90                                                                             | 1.81      |
| <i>N. pachyderma</i> | S2           | 1            | 211           | 117.78                                   | 67.35                                                                                | 8.01       | 65.97                                                                             | 1.82      |
| <i>N. pachyderma</i> | S2           | 1            | 214           | 119.46                                   | 43.26                                                                                | 0.78       | 41.78                                                                             | 1.62      |
| <i>N. pachyderma</i> | S2           | 1            | 217           | 121.14                                   | 59.58                                                                                | 1.24       | 56.74                                                                             | 1.75      |
| <i>N. pachyderma</i> | S8.1         | 3.5          | 151           | 84.18                                    | 27.63                                                                                | 2.17       | 37.86                                                                             | 1.58      |
| <i>N. pachyderma</i> | S8.1         | 3.5          | 175           | 97.62                                    | 42.71                                                                                | 2.07       | 50.47                                                                             | 1.70      |
| <i>N. pachyderma</i> | S8.1         | 3.5          | 197           | 109.94                                   | 74.23                                                                                | 2.39       | 77.89                                                                             | 1.89      |
| <i>N. pachyderma</i> | S8.1         | 3.5          | 211           | 117.78                                   | 59.67                                                                                | 1.62       | 58.44                                                                             | 1.77      |
| <i>N. pachyderma</i> | S8.1         | 3.5          | 216           | 120.58                                   | 82.48                                                                                | 2.00       | 78.91                                                                             | 1.90      |
| <i>N. pachyderma</i> | S8.1         | 3.5          | 219           | 122.26                                   | 63.34                                                                                | 1.60       | 59.77                                                                             | 1.78      |
| <i>N. pachyderma</i> | S10          | 0.5          | 262           | 146.34                                   | 20.44                                                                                | 1.63       | 16.11                                                                             | 1.21      |
| <i>N. pachyderma</i> | S10          | 0.5          | 270           | 150.82                                   | 25.01                                                                                | 1.91       | 19.13                                                                             | 1.28      |
| <i>N. pachyderma</i> | S10          | 0.5          | 303           | 169.30                                   | 18.06                                                                                | 1.44       | 12.31                                                                             | 1.09      |
| <i>N. pachyderma</i> | S10          | 0.5          | 305           | 170.42                                   | 22.99                                                                                | 0.93       | 15.56                                                                             | 1.19      |
| <i>N. pachyderma</i> | S11          | 2.5          | 250           | 139.62                                   | 31.52                                                                                | 0.25       | 26.04                                                                             | 1.42      |
| <i>N. pachyderma</i> | S11          | 2.5          | 294           | 164.26                                   | 73.79                                                                                | 2.96       | 51.83                                                                             | 1.71      |
| <i>N. pachyderma</i> | S12          | 10           | 210           | 117.22                                   | 56.27                                                                                | 1.22       | 55.38                                                                             | 1.74      |
| <i>N. pachyderma</i> | S12          | 10           | 222           | 123.94                                   | 38.68                                                                                | 2.83       | 36.01                                                                             | 1.56      |
| <i>N. pachyderma</i> | S12          | 10           | 234           | 130.66                                   | 69.14                                                                                | 2.06       | 61.05                                                                             | 1.79      |
| <i>N. pachyderma</i> | S12          | 10           | 244           | 136.26                                   | 46.64                                                                                | 2.73       | 39.49                                                                             | 1.60      |
| <i>N. pachyderma</i> | S12          | 10           | 248           | 138.50                                   | 38.76                                                                                | 2.53       | 32.29                                                                             | 1.51      |
| <i>N. pachyderma</i> | S12          | 10           | 279           | 155.86                                   | 44.75                                                                                | 1.53       | 33.12                                                                             | 1.52      |
| <i>N. pachyderma</i> | S12          | 10           | 282           | 157.54                                   | 63.70                                                                                | 5.32       | 46.64                                                                             | 1.67      |
| <i>N. pachyderma</i> | S12          | 10           | 308           | 172.10                                   | 56.12                                                                                | 2.18       | 37.62                                                                             | 1.58      |
| <i>N. pachyderma</i> | S16          | 10           | 185           | 103.22                                   | 28.57                                                                                | 4.56       | 31.94                                                                             | 1.50      |
| <i>N. pachyderma</i> | S16          | 10           | 187           | 104.34                                   | 69.89                                                                                | 2.03       | 77.27                                                                             | 1.89      |
| <i>N. pachyderma</i> | S17          | 6            | 149           | 83.06                                    | 37.57                                                                                | 3.16       | 52.19                                                                             | 1.72      |
| <i>N. pachyderma</i> | S17          | 6            | 164           | 91.46                                    | 34.42                                                                                | 2.57       | 43.41                                                                             | 1.64      |
| <i>N. pachyderma</i> | S17          | 6            | 179           | 99.86                                    | 35.14                                                                                | 2.96       | 40.60                                                                             | 1.61      |
| <i>N. pachyderma</i> | S17          | 6            | 179           | 99.86                                    | 92.82                                                                                | 4.70       | 107.23                                                                            | 2.03      |
| <i>N. pachyderma</i> | S17          | 6            | 187           | 104.34                                   | 38.47                                                                                | 2.22       | 42.54                                                                             | 1.63      |
| <i>N. pachyderma</i> | S17          | 6            | 199           | 111.06                                   | 28.94                                                                                | 2.19       | 30.07                                                                             | 1.48      |
| <i>N. pachyderma</i> | S17          | 6            | 199           | 111.06                                   | 98.70                                                                                | 3.09       | 102.52                                                                            | 2.01      |
| <i>N. pachyderma</i> | S17          | 6            | 200           | 111.62                                   | 46.21                                                                                | 2.53       | 47.76                                                                             | 1.68      |
| <i>N. pachyderma</i> | S17          | 6            | 206           | 114.98                                   | 54.83                                                                                | 3.44       | 55.02                                                                             | 1.74      |
| <i>N. pachyderma</i> | S17          | 6            | 206           | 114.98                                   | 73.67                                                                                | 5.89       | 73.92                                                                             | 1.87      |
| <i>N. pachyderma</i> | S17          | 6            | 207           | 115.54                                   | 45.45                                                                                | 4.58       | 45.38                                                                             | 1.66      |
| <i>N. pachyderma</i> | S17          | 6            | 225           | 125.62                                   | 101.76                                                                               | 3.30       | 93.46                                                                             | 1.97      |
| <i>N. pachyderma</i> | S17          | 6            | 238           | 132.90                                   | 109.68                                                                               | 7.10       | 95.21                                                                             | 1.98      |
| <i>N. pachyderma</i> | S17          | 6            | 243           | 135.70                                   | 86.92                                                                                | 5.13       | 73.90                                                                             | 1.87      |
| <i>N. pachyderma</i> | S17          | 6            | 251           | 140.18                                   | 49.80                                                                                | 4.40       | 40.98                                                                             | 1.61      |
| <i>N. pachyderma</i> | S17          | 6            | 266           | 148.58                                   | 97.44                                                                                | 4.40       | 75.66                                                                             | 1.88      |
| <i>N. pachyderma</i> | S17          | 6            | 269           | 150.26                                   | 113.72                                                                               | 3.76       | 87.31                                                                             | 1.94      |
| <i>N. pachyderma</i> | S18          | 7.5          | 154           | 85.86                                    | 36.79                                                                                | 3.59       | 49.43                                                                             | 1.69      |
| <i>N. pachyderma</i> | S18          | 7.5          | 178           | 99.30                                    | 48.67                                                                                | 3.97       | 56.55                                                                             | 1.75      |
| <i>N. pachyderma</i> | S18          | 7.5          | 199           | 111.06                                   | 64.58                                                                                | 0.04       | 67.09                                                                             | 1.83      |
| <i>N. pachyderma</i> | S18          | 7.5          | 217           | 121.14                                   | 72.36                                                                                | 3.80       | 68.91                                                                             | 1.84      |
| <i>N. pachyderma</i> | S18          | 7.5          | 228           | 127.30                                   | 53.87                                                                                | 2.91       | 48.82                                                                             | 1.69      |
| <i>N. pachyderma</i> | S19          | 6            | 248           | 138.50                                   | 61.00                                                                                | 2.55       | 50.81                                                                             | 1.71      |

| Species               | Stat. /Lab | Temp<br>[°C] | Max Ø<br>[µm] | $\sqrt[3]{\text{Cavity Volume}}$<br>[µm] | Respiration Rate (LOQ*)<br>[pmol O <sub>2</sub> hr <sup>-1</sup> ind <sup>-1</sup> ] | SD<br>± 1σ | SNR<br>[pmol O <sub>2</sub> hr <sup>-1</sup> ind <sup>-1</sup> µm <sup>-1</sup> ] | Log10 SNR |
|-----------------------|------------|--------------|---------------|------------------------------------------|--------------------------------------------------------------------------------------|------------|-----------------------------------------------------------------------------------|-----------|
| <i>N. pachyderma</i>  | S19        | 6            | 224           | 125.06                                   | 70.04                                                                                | 0.91       | 64.61                                                                             | 1.81      |
| <i>N. pachyderma</i>  | S19        | 6            | 160           | 89.22                                    | 70.74                                                                                | 0.84       | 91.47                                                                             | 1.96      |
| <i>N. pachyderma</i>  | S19        | 6            | 205           | 114.42                                   | 51.80                                                                                | 2.25       | 52.23                                                                             | 1.72      |
| <i>N. pachyderma</i>  | S19        | 6            | 299           | 167.06                                   | 71.79                                                                                | 1.66       | 49.57                                                                             | 1.70      |
| <i>N. pachyderma</i>  | S19        | 6            | 307           | 171.54                                   | 112.63                                                                               | 0.71       | 75.75                                                                             | 1.88      |
| <i>N. pachyderma</i>  | S19        | 6            | 200           | 111.62                                   | 52.71                                                                                | 2.50       | 54.48                                                                             | 1.74      |
| <i>N. pachyderma</i>  | S19        | 6            | 221           | 123.38                                   | 86.32                                                                                | 1.94       | 80.72                                                                             | 1.91      |
| <i>N. pachyderma</i>  | S19        | 6            | 243           | 135.70                                   | 72.75                                                                                | 4.78       | 61.85                                                                             | 1.79      |
| <i>N. pachyderma</i>  | S19        | 6            | 186           | 103.78                                   | 35.58                                                                                | 2.82       | 39.55                                                                             | 1.60      |
| <i>T. quinqueloba</i> | Lab        | 2            | 162           | 90.34                                    | 8.59                                                                                 | 0.64       | 10.51                                                                             | 1.02      |
| <i>T. quinqueloba</i> | Lab        | 2            | 194           | 108.26                                   | 12.67                                                                                | 1.08       | 12.93                                                                             | 1.11      |
| <i>T. quinqueloba</i> | Lab        | 2            | 216           | 120.58                                   | 24.33                                                                                | 1.65       | 22.30                                                                             | 1.35      |
| <i>T. quinqueloba</i> | Lab        | 2            | 255           | 142.42                                   | 13.59                                                                                | 1.35       | 10.54                                                                             | 1.02      |
| <i>T. quinqueloba</i> | Lab        | 5            | 140           | 78.02                                    | 25.29                                                                                | 2.70       | 35.83                                                                             | 1.55      |
| <i>T. quinqueloba</i> | Lab        | 5            | 178           | 99.30                                    | 16.12                                                                                | 1.36       | 17.95                                                                             | 1.25      |
| <i>T. quinqueloba</i> | Lab        | 5            | 178           | 99.30                                    | 17.99                                                                                | 0.22       | 20.02                                                                             | 1.30      |
| <i>T. quinqueloba</i> | Lab        | 5            | 189           | 105.46                                   | 14.15                                                                                | 1.03       | 14.83                                                                             | 1.17      |
| <i>T. quinqueloba</i> | Lab        | 5            | 195           | 108.82                                   | 59.71                                                                                | 1.09       | 60.65                                                                             | 1.78      |
| <i>T. quinqueloba</i> | Lab        | 5            | 208           | 116.10                                   | 33.23                                                                                | 0.84       | 31.64                                                                             | 1.50      |
| <i>T. quinqueloba</i> | Lab        | 5            | 214           | 119.46                                   | 30.41                                                                                | 0.62       | 28.13                                                                             | 1.45      |
| <i>T. quinqueloba</i> | Lab        | 5            | 228           | 127.30                                   | 33.59                                                                                | 1.61       | 29.16                                                                             | 1.46      |
| <i>T. quinqueloba</i> | Lab        | 5            | 230           | 128.42                                   | 43.80                                                                                | 0.39       | 37.69                                                                             | 1.58      |
| <i>T. quinqueloba</i> | Lab        | 5            | 232           | 129.54                                   | 32.89                                                                                | 0.56       | 28.06                                                                             | 1.45      |
| <i>T. quinqueloba</i> | Lab        | 8            | 161           | 89.78                                    | 36.70                                                                                | 0.74       | 45.18                                                                             | 1.65      |
| <i>T. quinqueloba</i> | Lab        | 8            | 199           | 111.06                                   | 45.80                                                                                | 2.69       | 45.58                                                                             | 1.66      |
| <i>T. quinqueloba</i> | Lab        | 8            | 205           | 114.42                                   | 42.97                                                                                | 1.81       | 41.51                                                                             | 1.62      |
| <i>T. quinqueloba</i> | Lab        | 8            | 209           | 116.66                                   | 34.73                                                                                | 1.11       | 32.90                                                                             | 1.52      |
| <i>T. quinqueloba</i> | Lab        | 13           | 154           | 85.86                                    | 79.57                                                                                | 0.87       | 102.42                                                                            | 2.01      |
| <i>T. quinqueloba</i> | Lab        | 13           | 182           | 101.54                                   | 52.83                                                                                | 0.95       | 57.51                                                                             | 1.76      |
| <i>T. quinqueloba</i> | Lab        | 13           | 197           | 109.94                                   | 128.34                                                                               | 1.33       | 129.02                                                                            | 2.11      |
| <i>T. quinqueloba</i> | Lab        | 13           | 210           | 117.22                                   | 74.21                                                                                | 0.55       | 69.97                                                                             | 1.84      |
| <i>T. quinqueloba</i> | Lab        | 13           | 219           | 122.26                                   | 60.94                                                                                | 0.82       | 55.09                                                                             | 1.74      |

**Table S11:** Source data for Figure 7. Please note that respiration rates are size normalized for biovolume

| Source     | Species            | Stat. /Lab | Temp<br>[°C] | Max Ø<br>[µm] | Bio volume<br>[µm <sup>3</sup> ] | Respiration Rate (LOQ)<br>[pmol O <sub>2</sub> h <sup>-1</sup> ind <sup>-1</sup> ] | SNR <sub>Bio</sub><br>[pmol O <sub>2</sub> h <sup>-1</sup> ind <sup>-1</sup> µm <sup>3</sup> ] | Log10 SNR <sub>Bio</sub> |
|------------|--------------------|------------|--------------|---------------|----------------------------------|------------------------------------------------------------------------------------|------------------------------------------------------------------------------------------------|--------------------------|
| This Study | <i>N. incompta</i> | S1         | 13           | 205           | 1.50E+06                         | 321.73                                                                             | 540.35                                                                                         | 2.73                     |
| This Study | <i>N. incompta</i> | S1         | 13           | 230           | 2.12E+06                         | 253.77                                                                             | 301.46                                                                                         | 2.48                     |
| This Study | <i>N. incompta</i> | S1         | 13           | 242           | 2.47E+06                         | 366.21                                                                             | 373.31                                                                                         | 2.57                     |
| This Study | <i>N. incompta</i> | S1         | 13           | 260           | 3.06E+06                         | 411.21                                                                             | 337.81                                                                                         | 2.53                     |
| This Study | <i>N. incompta</i> | S1         | 13           | 273           | 3.55E+06                         | 311.54                                                                             | 221.00                                                                                         | 2.34                     |
| This Study | <i>N. incompta</i> | S1         | 13           | 286           | 4.08E+06                         | 378.03                                                                             | 233.15                                                                                         | 2.37                     |
| This Study | <i>N. incompta</i> | S16        | 10           | 211           | 1.63E+06                         | 96.49                                                                              | 148.58                                                                                         | 2.17                     |
| This Study | <i>N. incompta</i> | S16        | 10           | 226           | 2.01E+06                         | 118.34                                                                             | 148.20                                                                                         | 2.17                     |
| This Study | <i>N. incompta</i> | S16        | 10           | 228           | 2.06E+06                         | 200.19                                                                             | 244.15                                                                                         | 2.39                     |
| This Study | <i>N. incompta</i> | S16        | 10           | 232           | 2.17E+06                         | 95.35                                                                              | 110.36                                                                                         | 2.04                     |
| This Study | <i>N. incompta</i> | S16        | 10           | 238           | 2.35E+06                         | 92.13                                                                              | 98.74                                                                                          | 1.99                     |
| This Study | <i>N. incompta</i> | S16        | 10           | 238           | 2.35E+06                         | 173.96                                                                             | 186.46                                                                                         | 2.27                     |
| This Study | <i>N. incompta</i> | S16        | 10           | 241           | 2.44E+06                         | 149.19                                                                             | 153.99                                                                                         | 2.19                     |
| This Study | <i>N. incompta</i> | S16        | 10           | 255           | 2.89E+06                         | 206.28                                                                             | 179.65                                                                                         | 2.25                     |
| This Study | <i>N. incompta</i> | S20        | 14           | 180           | 1.01E+06                         | 144.38                                                                             | 358.71                                                                                         | 2.55                     |
| This Study | <i>N. incompta</i> | S20        | 14           | 181           | 1.03E+06                         | 149.89                                                                             | 366.24                                                                                         | 2.56                     |
| This Study | <i>N. incompta</i> | S20        | 14           | 194           | 1.27E+06                         | 195.34                                                                             | 387.32                                                                                         | 2.59                     |
| This Study | <i>N. incompta</i> | S20        | 14           | 211           | 1.63E+06                         | 184.68                                                                             | 284.38                                                                                         | 2.45                     |
| This Study | <i>N. incompta</i> | S20        | 14           | 239           | 2.38E+06                         | 178.74                                                                             | 189.18                                                                                         | 2.28                     |
| This Study | <i>N. incompta</i> | S20        | 14           | 254           | 2.85E+06                         | 257.87                                                                             | 227.26                                                                                         | 2.36                     |
| This Study | <i>N. incompta</i> | S20        | 14           | 266           | 3.28E+06                         | 261.54                                                                             | 200.61                                                                                         | 2.30                     |
| This Study | <i>N. incompta</i> | S20        | 14           | 270           | 3.43E+06                         | 228.16                                                                             | 167.32                                                                                         | 2.22                     |
| This Study | <i>N. incompta</i> | S20        | 14           | 271           | 3.47E+06                         | 245.77                                                                             | 178.24                                                                                         | 2.25                     |
| This Study | <i>N. incompta</i> | S20        | 14           | 278           | 3.75E+06                         | 235.91                                                                             | 158.46                                                                                         | 2.20                     |
| This Study | <i>N. incompta</i> | S20        | 14           | 287           | 4.12E+06                         | 279.62                                                                             | 170.66                                                                                         | 2.23                     |

| Source     | Species              | Stat. /Lab | Temp<br>[°C] | Max Ø<br>[µm] | Bio volume<br>[µm <sup>3</sup> ] | Respiration Rate (LOQ)<br>[pmol O <sub>2</sub> h <sup>-1</sup> ind <sup>-1</sup> ] | SNR <sub>Bio</sub><br>[pmol O <sub>2</sub> h <sup>-1</sup> ind <sup>-1</sup> µm <sup>3</sup> ] | Log10 SNR <sub>Bio</sub> |
|------------|----------------------|------------|--------------|---------------|----------------------------------|------------------------------------------------------------------------------------|------------------------------------------------------------------------------------------------|--------------------------|
| This Study | <i>N. pachyderma</i> | Lab        | 2            | 179           | 9.96E+05                         | 28.73                                                                              | 51.56                                                                                          | 1.71                     |
| This Study | <i>N. pachyderma</i> | Lab        | 2            | 190           | 1.19E+06                         | 22.76                                                                              | 34.13                                                                                          | 1.53                     |
| This Study | <i>N. pachyderma</i> | Lab        | 2            | 190           | 1.19E+06                         | 60.31                                                                              | 90.45                                                                                          | 1.96                     |
| This Study | <i>N. pachyderma</i> | Lab        | 2            | 207           | 1.54E+06                         | 45.19                                                                              | 52.36                                                                                          | 1.72                     |
| This Study | <i>N. pachyderma</i> | Lab        | 2            | 260           | 3.06E+06                         | 94.56                                                                              | 55.18                                                                                          | 1.74                     |
| This Study | <i>N. pachyderma</i> | Lab        | 2            | 264           | 3.21E+06                         | 69.60                                                                              | 38.79                                                                                          | 1.59                     |
| This Study | <i>N. pachyderma</i> | Lab        | 2            | 270           | 3.43E+06                         | 119.76                                                                             | 62.38                                                                                          | 1.80                     |
| This Study | <i>N. pachyderma</i> | Lab        | 2            | 317           | 5.56E+06                         | 144.09                                                                             | 46.33                                                                                          | 1.67                     |
| This Study | <i>N. pachyderma</i> | Lab        | 5            | 126           | 3.46E+05                         | 12.64                                                                              | 65.34                                                                                          | 1.82                     |
| This Study | <i>N. pachyderma</i> | Lab        | 5            | 150           | 5.85E+05                         | 34.11                                                                              | 104.26                                                                                         | 2.02                     |
| This Study | <i>N. pachyderma</i> | Lab        | 5            | 160           | 7.10E+05                         | 22.16                                                                              | 55.75                                                                                          | 1.75                     |
| This Study | <i>N. pachyderma</i> | Lab        | 5            | 181           | 1.03E+06                         | 45.52                                                                              | 79.00                                                                                          | 1.90                     |
| This Study | <i>N. pachyderma</i> | Lab        | 5            | 190           | 1.19E+06                         | 40.00                                                                              | 59.98                                                                                          | 1.78                     |
| This Study | <i>N. pachyderma</i> | Lab        | 5            | 190           | 1.19E+06                         | 50.43                                                                              | 75.63                                                                                          | 1.88                     |
| This Study | <i>N. pachyderma</i> | Lab        | 5            | 198           | 1.35E+06                         | 38.11                                                                              | 50.48                                                                                          | 1.70                     |
| This Study | <i>N. pachyderma</i> | Lab        | 5            | 203           | 1.45E+06                         | 38.39                                                                              | 47.17                                                                                          | 1.67                     |
| This Study | <i>N. pachyderma</i> | Lab        | 5            | 205           | 1.50E+06                         | 59.00                                                                              | 70.39                                                                                          | 1.85                     |
| This Study | <i>N. pachyderma</i> | Lab        | 5            | 208           | 1.56E+06                         | 58.34                                                                              | 66.62                                                                                          | 1.82                     |
| This Study | <i>N. pachyderma</i> | Lab        | 5            | 217           | 1.78E+06                         | 85.02                                                                              | 85.47                                                                                          | 1.93                     |
| This Study | <i>N. pachyderma</i> | Lab        | 5            | 218           | 1.80E+06                         | 58.86                                                                              | 58.36                                                                                          | 1.77                     |
| This Study | <i>N. pachyderma</i> | Lab        | 5            | 223           | 1.93E+06                         | 48.00                                                                              | 44.46                                                                                          | 1.65                     |
| This Study | <i>N. pachyderma</i> | Lab        | 5            | 229           | 2.09E+06                         | 91.07                                                                              | 77.87                                                                                          | 1.89                     |
| This Study | <i>N. pachyderma</i> | Lab        | 5            | 233           | 2.20E+06                         | 88.34                                                                              | 71.70                                                                                          | 1.86                     |
| This Study | <i>N. pachyderma</i> | Lab        | 5            | 234           | 2.23E+06                         | 84.99                                                                              | 68.09                                                                                          | 1.83                     |
| This Study | <i>N. pachyderma</i> | Lab        | 5            | 247           | 2.62E+06                         | 77.05                                                                              | 52.46                                                                                          | 1.72                     |
| This Study | <i>N. pachyderma</i> | Lab        | 5            | 283           | 3.95E+06                         | 156.67                                                                             | 70.85                                                                                          | 1.85                     |
| This Study | <i>N. pachyderma</i> | Lab        | 5            | 298           | 4.62E+06                         | 116.97                                                                             | 45.29                                                                                          | 1.66                     |
| This Study | <i>N. pachyderma</i> | Lab        | 8            | 110           | 2.29E+05                         | 34.00                                                                              | 264.79                                                                                         | 2.42                     |
| This Study | <i>N. pachyderma</i> | Lab        | 8            | 117           | 2.76E+05                         | 41.81                                                                              | 270.31                                                                                         | 2.43                     |
| This Study | <i>N. pachyderma</i> | Lab        | 8            | 122           | 3.14E+05                         | 33.28                                                                              | 189.65                                                                                         | 2.28                     |
| This Study | <i>N. pachyderma</i> | Lab        | 8            | 133           | 4.07E+05                         | 34.23                                                                              | 150.33                                                                                         | 2.18                     |
| This Study | <i>N. pachyderma</i> | Lab        | 8            | 137           | 4.45E+05                         | 26.54                                                                              | 106.60                                                                                         | 2.03                     |
| This Study | <i>N. pachyderma</i> | Lab        | 8            | 138           | 4.55E+05                         | 39.29                                                                              | 154.41                                                                                         | 2.19                     |
| This Study | <i>N. pachyderma</i> | Lab        | 8            | 142           | 4.96E+05                         | 63.58                                                                              | 229.24                                                                                         | 2.36                     |
| This Study | <i>N. pachyderma</i> | Lab        | 8            | 151           | 5.97E+05                         | 38.30                                                                              | 114.76                                                                                         | 2.06                     |
| This Study | <i>N. pachyderma</i> | Lab        | 8            | 156           | 6.58E+05                         | 24.40                                                                              | 66.27                                                                                          | 1.82                     |
| This Study | <i>N. pachyderma</i> | Lab        | 8            | 160           | 7.10E+05                         | 38.74                                                                              | 97.48                                                                                          | 1.99                     |
| This Study | <i>N. pachyderma</i> | Lab        | 8            | 163           | 7.51E+05                         | 52.77                                                                              | 125.56                                                                                         | 2.10                     |
| This Study | <i>N. pachyderma</i> | Lab        | 8            | 166           | 7.94E+05                         | 59.34                                                                              | 133.64                                                                                         | 2.13                     |
| This Study | <i>N. pachyderma</i> | Lab        | 8            | 183           | 1.06E+06                         | 90.16                                                                              | 151.39                                                                                         | 2.18                     |
| This Study | <i>N. pachyderma</i> | Lab        | 8            | 190           | 1.19E+06                         | 98.54                                                                              | 147.78                                                                                         | 2.17                     |
| This Study | <i>N. pachyderma</i> | Lab        | 8            | 210           | 1.61E+06                         | 73.38                                                                              | 81.42                                                                                          | 1.91                     |
| This Study | <i>N. pachyderma</i> | Lab        | 13           | 120           | 2.98E+05                         | 45.86                                                                              | 274.71                                                                                         | 2.44                     |
| This Study | <i>N. pachyderma</i> | Lab        | 13           | 123           | 3.21E+05                         | 59.01                                                                              | 328.10                                                                                         | 2.52                     |
| This Study | <i>N. pachyderma</i> | Lab        | 13           | 155           | 6.45E+05                         | 88.71                                                                              | 245.62                                                                                         | 2.39                     |
| This Study | <i>N. pachyderma</i> | Lab        | 13           | 157           | 6.71E+05                         | 71.09                                                                              | 189.38                                                                                         | 2.28                     |
| This Study | <i>N. pachyderma</i> | Lab        | 13           | 160           | 7.10E+05                         | 95.16                                                                              | 239.45                                                                                         | 2.38                     |
| This Study | <i>N. pachyderma</i> | S2         | 1            | 176           | 9.46E+05                         | 57.36                                                                              | 108.31                                                                                         | 2.03                     |
| This Study | <i>N. pachyderma</i> | S2         | 1            | 178           | 9.79E+05                         | 35.17                                                                              | 64.19                                                                                          | 1.81                     |
| This Study | <i>N. pachyderma</i> | S2         | 1            | 189           | 1.17E+06                         | 38.95                                                                              | 59.35                                                                                          | 1.77                     |
| This Study | <i>N. pachyderma</i> | S2         | 1            | 197           | 1.33E+06                         | 32.09                                                                              | 43.16                                                                                          | 1.64                     |
| This Study | <i>N. pachyderma</i> | S2         | 1            | 199           | 1.37E+06                         | 38.47                                                                              | 50.19                                                                                          | 1.70                     |
| This Study | <i>N. pachyderma</i> | S2         | 1            | 204           | 1.48E+06                         | 63.06                                                                              | 76.35                                                                                          | 1.88                     |
| This Study | <i>N. pachyderma</i> | S2         | 1            | 211           | 1.63E+06                         | 67.35                                                                              | 73.67                                                                                          | 1.87                     |
| This Study | <i>N. pachyderma</i> | S2         | 1            | 214           | 1.70E+06                         | 43.26                                                                              | 45.35                                                                                          | 1.66                     |
| This Study | <i>N. pachyderma</i> | S2         | 1            | 217           | 1.78E+06                         | 59.58                                                                              | 59.90                                                                                          | 1.78                     |
| This Study | <i>N. pachyderma</i> | S8.1       | 3.5          | 151           | 5.97E+05                         | 27.63                                                                              | 82.77                                                                                          | 1.92                     |
| This Study | <i>N. pachyderma</i> | S8.1       | 3.5          | 175           | 9.30E+05                         | 42.71                                                                              | 82.04                                                                                          | 1.91                     |
| This Study | <i>N. pachyderma</i> | S8.1       | 3.5          | 197           | 1.33E+06                         | 74.23                                                                              | 99.83                                                                                          | 2.00                     |
| This Study | <i>N. pachyderma</i> | S8.1       | 3.5          | 211           | 1.63E+06                         | 59.67                                                                              | 65.26                                                                                          | 1.81                     |
| This Study | <i>N. pachyderma</i> | S8.1       | 3.5          | 216           | 1.75E+06                         | 82.48                                                                              | 84.07                                                                                          | 1.92                     |
| This Study | <i>N. pachyderma</i> | S8.1       | 3.5          | 219           | 1.83E+06                         | 63.34                                                                              | 61.95                                                                                          | 1.79                     |
| This Study | <i>N. pachyderma</i> | S10        | 0.5          | 262           | 3.13E+06                         | 20.44                                                                              | 11.66                                                                                          | 1.07                     |
| This Study | <i>N. pachyderma</i> | S10        | 0.5          | 270           | 3.43E+06                         | 25.01                                                                              | 13.03                                                                                          | 1.11                     |

| Source     | Species               | Stat. /Lab | Temp<br>[°C] | Max Ø<br>[µm] | Bio volume<br>[µm <sup>3</sup> ] | Respiration Rate (LOQ)<br>[pmol O <sub>2</sub> h <sup>-1</sup> ind <sup>-1</sup> ] | SNR <sub>Bio</sub><br>[pmol O <sub>2</sub> h <sup>-1</sup> ind <sup>-1</sup> µm <sup>3</sup> ] | Log10 SNR <sub>Bio</sub> |
|------------|-----------------------|------------|--------------|---------------|----------------------------------|------------------------------------------------------------------------------------|------------------------------------------------------------------------------------------------|--------------------------|
| This Study | <i>N. pachyderma</i>  | S10        | 0.5          | 303           | 4.85E+06                         | 18.06                                                                              | 6.65                                                                                           | 0.82                     |
| This Study | <i>N. pachyderma</i>  | S10        | 0.5          | 305           | 4.95E+06                         | 22.99                                                                              | 8.30                                                                                           | 0.92                     |
| This Study | <i>N. pachyderma</i>  | S11        | 2.5          | 250           | 2.72E+06                         | 31.52                                                                              | 20.70                                                                                          | 1.32                     |
| This Study | <i>N. pachyderma</i>  | S11        | 2.5          | 294           | 4.43E+06                         | 73.79                                                                              | 29.76                                                                                          | 1.47                     |
| This Study | <i>N. pachyderma</i>  | S12        | 10           | 210           | 1.61E+06                         | 56.27                                                                              | 62.43                                                                                          | 1.80                     |
| This Study | <i>N. pachyderma</i>  | S12        | 10           | 222           | 1.90E+06                         | 38.68                                                                              | 36.31                                                                                          | 1.56                     |
| This Study | <i>N. pachyderma</i>  | S12        | 10           | 234           | 2.23E+06                         | 69.14                                                                              | 55.39                                                                                          | 1.74                     |
| This Study | <i>N. pachyderma</i>  | S12        | 10           | 244           | 2.53E+06                         | 46.64                                                                              | 32.95                                                                                          | 1.52                     |
| This Study | <i>N. pachyderma</i>  | S12        | 10           | 248           | 2.66E+06                         | 38.76                                                                              | 26.07                                                                                          | 1.42                     |
| This Study | <i>N. pachyderma</i>  | S12        | 10           | 279           | 3.79E+06                         | 44.75                                                                              | 21.12                                                                                          | 1.32                     |
| This Study | <i>N. pachyderma</i>  | S12        | 10           | 282           | 3.91E+06                         | 63.70                                                                              | 29.11                                                                                          | 1.46                     |
| This Study | <i>N. pachyderma</i>  | S12        | 10           | 308           | 5.10E+06                         | 56.12                                                                              | 19.68                                                                                          | 1.29                     |
| This Study | <i>N. pachyderma</i>  | S16        | 10           | 185           | 1.10E+06                         | 28.57                                                                              | 46.43                                                                                          | 1.67                     |
| This Study | <i>N. pachyderma</i>  | S16        | 10           | 187           | 1.14E+06                         | 69.89                                                                              | 109.95                                                                                         | 2.04                     |
| This Study | <i>N. pachyderma</i>  | S17        | 6            | 149           | 5.73E+05                         | 37.57                                                                              | 117.18                                                                                         | 2.07                     |
| This Study | <i>N. pachyderma</i>  | S17        | 6            | 164           | 7.65E+05                         | 34.42                                                                              | 80.39                                                                                          | 1.91                     |
| This Study | <i>N. pachyderma</i>  | S17        | 6            | 179           | 9.96E+05                         | 35.14                                                                              | 63.07                                                                                          | 1.80                     |
| This Study | <i>N. pachyderma</i>  | S17        | 6            | 179           | 9.96E+05                         | 92.82                                                                              | 166.57                                                                                         | 2.22                     |
| This Study | <i>N. pachyderma</i>  | S17        | 6            | 187           | 1.14E+06                         | 38.47                                                                              | 60.53                                                                                          | 1.78                     |
| This Study | <i>N. pachyderma</i>  | S17        | 6            | 199           | 1.37E+06                         | 28.94                                                                              | 37.76                                                                                          | 1.58                     |
| This Study | <i>N. pachyderma</i>  | S17        | 6            | 199           | 1.37E+06                         | 98.70                                                                              | 128.76                                                                                         | 2.11                     |
| This Study | <i>N. pachyderma</i>  | S17        | 6            | 200           | 1.39E+06                         | 46.21                                                                              | 59.39                                                                                          | 1.77                     |
| This Study | <i>N. pachyderma</i>  | S17        | 6            | 206           | 1.52E+06                         | 54.83                                                                              | 64.47                                                                                          | 1.81                     |
| This Study | <i>N. pachyderma</i>  | S17        | 6            | 206           | 1.52E+06                         | 73.67                                                                              | 86.62                                                                                          | 1.94                     |
| This Study | <i>N. pachyderma</i>  | S17        | 6            | 207           | 1.54E+06                         | 45.45                                                                              | 52.66                                                                                          | 1.72                     |
| This Study | <i>N. pachyderma</i>  | S17        | 6            | 225           | 1.98E+06                         | 101.76                                                                             | 91.74                                                                                          | 1.96                     |
| This Study | <i>N. pachyderma</i>  | S17        | 6            | 238           | 2.35E+06                         | 109.68                                                                             | 83.50                                                                                          | 1.92                     |
| This Study | <i>N. pachyderma</i>  | S17        | 6            | 243           | 2.50E+06                         | 86.92                                                                              | 62.17                                                                                          | 1.79                     |
| This Study | <i>N. pachyderma</i>  | S17        | 6            | 251           | 2.75E+06                         | 49.80                                                                              | 32.31                                                                                          | 1.51                     |
| This Study | <i>N. pachyderma</i>  | S17        | 6            | 266           | 3.28E+06                         | 97.44                                                                              | 53.09                                                                                          | 1.73                     |
| This Study | <i>N. pachyderma</i>  | S17        | 6            | 269           | 3.39E+06                         | 113.72                                                                             | 59.90                                                                                          | 1.78                     |
| This Study | <i>N. pachyderma</i>  | S18        | 7.5          | 154           | 6.33E+05                         | 36.79                                                                              | 103.88                                                                                         | 2.02                     |
| This Study | <i>N. pachyderma</i>  | S18        | 7.5          | 178           | 9.79E+05                         | 48.67                                                                              | 88.84                                                                                          | 1.95                     |
| This Study | <i>N. pachyderma</i>  | S18        | 7.5          | 199           | 1.37E+06                         | 64.58                                                                              | 84.25                                                                                          | 1.93                     |
| This Study | <i>N. pachyderma</i>  | S18        | 7.5          | 217           | 1.78E+06                         | 72.36                                                                              | 72.74                                                                                          | 1.86                     |
| This Study | <i>N. pachyderma</i>  | S18        | 7.5          | 228           | 2.06E+06                         | 53.87                                                                              | 46.67                                                                                          | 1.67                     |
| This Study | <i>N. pachyderma</i>  | S19        | 6            | 248           | 2.66E+06                         | 61.00                                                                              | 41.03                                                                                          | 1.61                     |
| This Study | <i>N. pachyderma</i>  | S19        | 6            | 224           | 1.96E+06                         | 70.04                                                                              | 64.00                                                                                          | 1.81                     |
| This Study | <i>N. pachyderma</i>  | S19        | 6            | 160           | 7.10E+05                         | 70.74                                                                              | 178.01                                                                                         | 2.25                     |
| This Study | <i>N. pachyderma</i>  | S19        | 6            | 205           | 1.50E+06                         | 51.80                                                                              | 61.80                                                                                          | 1.79                     |
| This Study | <i>N. pachyderma</i>  | S19        | 6            | 299           | 4.66E+06                         | 71.79                                                                              | 27.52                                                                                          | 1.44                     |
| This Study | <i>N. pachyderma</i>  | S19        | 6            | 307           | 5.05E+06                         | 112.63                                                                             | 39.88                                                                                          | 1.60                     |
| This Study | <i>N. pachyderma</i>  | S19        | 6            | 200           | 1.39E+06                         | 52.71                                                                              | 67.74                                                                                          | 1.83                     |
| This Study | <i>N. pachyderma</i>  | S19        | 6            | 221           | 1.88E+06                         | 86.32                                                                              | 82.14                                                                                          | 1.91                     |
| This Study | <i>N. pachyderma</i>  | S19        | 6            | 243           | 2.50E+06                         | 72.75                                                                              | 52.03                                                                                          | 1.72                     |
| This Study | <i>N. pachyderma</i>  | S19        | 6            | 186           | 1.12E+06                         | 35.58                                                                              | 56.88                                                                                          | 1.75                     |
| This Study | <i>T. quinqueloba</i> | Lab        | 2            | 162           | 7.37E+05                         | 8.59                                                                               | 16.62                                                                                          | 1.22                     |
| This Study | <i>T. quinqueloba</i> | Lab        | 2            | 194           | 1.27E+06                         | 12.67                                                                              | 14.23                                                                                          | 1.15                     |
| This Study | <i>T. quinqueloba</i> | Lab        | 2            | 216           | 1.75E+06                         | 24.33                                                                              | 19.79                                                                                          | 1.30                     |
| This Study | <i>T. quinqueloba</i> | Lab        | 2            | 255           | 2.89E+06                         | 13.59                                                                              | 6.71                                                                                           | 0.83                     |
| This Study | <i>T. quinqueloba</i> | Lab        | 5            | 140           | 4.75E+05                         | 25.29                                                                              | 75.93                                                                                          | 1.88                     |
| This Study | <i>T. quinqueloba</i> | Lab        | 5            | 178           | 9.79E+05                         | 16.12                                                                              | 23.48                                                                                          | 1.37                     |
| This Study | <i>T. quinqueloba</i> | Lab        | 5            | 178           | 9.79E+05                         | 17.99                                                                              | 26.20                                                                                          | 1.42                     |
| This Study | <i>T. quinqueloba</i> | Lab        | 5            | 189           | 1.17E+06                         | 14.15                                                                              | 17.20                                                                                          | 1.24                     |
| This Study | <i>T. quinqueloba</i> | Lab        | 5            | 195           | 1.29E+06                         | 59.71                                                                              | 66.07                                                                                          | 1.82                     |
| This Study | <i>T. quinqueloba</i> | Lab        | 5            | 208           | 1.56E+06                         | 33.23                                                                              | 30.28                                                                                          | 1.48                     |
| This Study | <i>T. quinqueloba</i> | Lab        | 5            | 214           | 1.70E+06                         | 30.41                                                                              | 25.43                                                                                          | 1.41                     |
| This Study | <i>T. quinqueloba</i> | Lab        | 5            | 228           | 2.06E+06                         | 33.59                                                                              | 23.21                                                                                          | 1.37                     |
| This Study | <i>T. quinqueloba</i> | Lab        | 5            | 230           | 2.12E+06                         | 43.80                                                                              | 29.48                                                                                          | 1.47                     |
| This Study | <i>T. quinqueloba</i> | Lab        | 5            | 232           | 2.17E+06                         | 32.89                                                                              | 21.57                                                                                          | 1.33                     |
| This Study | <i>T. quinqueloba</i> | Lab        | 8            | 161           | 7.24E+05                         | 36.70                                                                              | 72.31                                                                                          | 1.86                     |
| This Study | <i>T. quinqueloba</i> | Lab        | 8            | 199           | 1.37E+06                         | 45.80                                                                              | 47.67                                                                                          | 1.68                     |
| This Study | <i>T. quinqueloba</i> | Lab        | 8            | 205           | 1.50E+06                         | 42.97                                                                              | 40.90                                                                                          | 1.61                     |
| This Study | <i>T. quinqueloba</i> | Lab        | 8            | 209           | 1.59E+06                         | 34.73                                                                              | 31.18                                                                                          | 1.49                     |

| Source              | Species                   | Stat. /Lab | Temp<br>[°C] | Max Ø<br>[µm] | Bio volume<br>[µm <sup>3</sup> ] | Respiration Rate (LOQ)<br>[pmol O <sub>2</sub> h <sup>-1</sup> ind <sup>-1</sup> ] | SNR <sub>Bio</sub><br>[pmol O <sub>2</sub> h <sup>-1</sup> ind <sup>-1</sup> µm <sup>3</sup> ] | Log10 SNR <sub>Bio</sub> |
|---------------------|---------------------------|------------|--------------|---------------|----------------------------------|------------------------------------------------------------------------------------|------------------------------------------------------------------------------------------------|--------------------------|
| This Study          | <i>T. quinqueloba</i>     | Lab        | 13           | 154           | 6.33E+05                         | 79.57                                                                              | 179.23                                                                                         | 2.25                     |
| This Study          | <i>T. quinqueloba</i>     | Lab        | 13           | 182           | 1.05E+06                         | 52.83                                                                              | 71.95                                                                                          | 1.86                     |
| This Study          | <i>T. quinqueloba</i>     | Lab        | 13           | 197           | 1.33E+06                         | 128.34                                                                             | 137.71                                                                                         | 2.14                     |
| This Study          | <i>T. quinqueloba</i>     | Lab        | 13           | 210           | 1.61E+06                         | 74.21                                                                              | 65.69                                                                                          | 1.82                     |
| This Study          | <i>T. quinqueloba</i>     | Lab        | 13           | 219           | 1.83E+06                         | 60.94                                                                              | 47.54                                                                                          | 1.68                     |
| Rink et al. 1998    | <i>O. universa</i>        | -          | 21           | 297           | 1.53E+07                         | 1720                                                                               | 6993.15                                                                                        | 3.84                     |
| Rink et al. 1998    | <i>O. universa</i>        | -          | 21.5         | 473           | 4.48E+07                         | 1710                                                                               | 2381.41                                                                                        | 3.38                     |
| Rink et al. 1998    | <i>O. universa</i>        | -          | 22           | 463           | 4.25E+07                         | 4690                                                                               | 6877.57                                                                                        | 3.84                     |
| Rink et al. 1998    | <i>O. universa</i>        | -          | 23           | 554           | 6.60E+07                         | 5940                                                                               | 5609.83                                                                                        | 3.75                     |
| Rink et al. 1998    | <i>O. universa</i>        | -          | 23.5         | 554           | 6.60E+07                         | 5170                                                                               | 4882.63                                                                                        | 3.69                     |
| Lombard et al. 2009 | <i>O. universa</i>        | -          | 15.3         | 521           | 7.40E+07                         | 350                                                                                | 294.99                                                                                         | 2.47                     |
| Lombard et al. 2009 | <i>O. universa</i>        | -          | 19.9         | 521           | 7.40E+07                         | 600                                                                                | 505.70                                                                                         | 2.70                     |
| Lombard et al. 2009 | <i>O. universa</i>        | -          | 24.3         | 521           | 7.40E+07                         | 1080                                                                               | 910.25                                                                                         | 2.96                     |
| Lombard et al. 2009 | <i>O. universa</i>        | -          | 29.3         | 521           | 7.40E+07                         | 1910                                                                               | 1609.80                                                                                        | 3.21                     |
| Burke et al. 2025   | <i>O. universa</i>        | -          | 21           | 670           | 9.30E+07                         | 5596.43                                                                            | 3754.98                                                                                        | 3.57                     |
| Burke et al. 2025   | <i>G. ruber</i>           | -          | 21           | 338           | 5.40E+06                         | 2004.70                                                                            | 3812.27                                                                                        | 3.58                     |
| Burke et al. 2025   | <i>G. ruber</i>           | -          | 21           | 361           | 9.65E+06                         | 682.73                                                                             | 727.21                                                                                         | 2.86                     |
| Burke et al. 2025   | <i>G. ruber</i>           | -          | 21           | 384           | 1.55E+07                         | 2004.70                                                                            | 1327.70                                                                                        | 3.12                     |
| Burke et al. 2025   | <i>G. ruber</i>           | -          | 21           | 526           | 3.66E+07                         | 631.23                                                                             | 177.42                                                                                         | 2.25                     |
| Burke et al. 2025   | <i>G. ruber</i>           | -          | 24           | 230           | 2.30E+06                         | 1087.07                                                                            | 4863.63                                                                                        | 3.69                     |
| Burke et al. 2025   | <i>G. ruber</i>           | -          | 24           | 277           | 4.60E+06                         | 321.70                                                                             | 718.00                                                                                         | 2.86                     |
| Lombard et al. 2009 | <i>G. ruber</i>           | -          | 17.3         | 189           | 6.13E+06                         | 150                                                                                | 251.35                                                                                         | 2.40                     |
| Lombard et al. 2009 | <i>G. ruber</i>           | -          | 19.4         | 249           | 1.06E+07                         | 190                                                                                | 184.87                                                                                         | 2.27                     |
| Lombard et al. 2009 | <i>G. ruber</i>           | -          | 21.6         | 189           | 6.13E+06                         | 190                                                                                | 318.37                                                                                         | 2.50                     |
| Lombard et al. 2009 | <i>G. ruber</i>           | -          | 24.1         | 189           | 6.13E+06                         | 430                                                                                | 720.53                                                                                         | 2.86                     |
| Lombard et al. 2009 | <i>G. ruber</i>           | -          | 24.1         | 241           | 9.88E+06                         | 330                                                                                | 343.34                                                                                         | 2.54                     |
| Lombard et al. 2009 | <i>G. ruber</i>           | -          | 24.2         | 249           | 1.06E+07                         | 470                                                                                | 457.30                                                                                         | 2.66                     |
| Lombard et al. 2009 | <i>G. ruber</i>           | -          | 29.5         | 249           | 1.06E+07                         | 670                                                                                | 651.90                                                                                         | 2.81                     |
| Lombard et al. 2009 | <i>G. ruber</i>           | -          | 29.6         | 241           | 9.88E+06                         | 620                                                                                | 645.07                                                                                         | 2.81                     |
| Lombard et al. 2009 | <i>G. siphonifera</i>     | -          | 18.7         | 347           | 2.17E+07                         | 670                                                                                | 670.00                                                                                         | 2.83                     |
| Lombard et al. 2009 | <i>G. siphonifera</i>     | -          | 24.3         | 347           | 2.17E+07                         | 820                                                                                | 820.00                                                                                         | 2.91                     |
| Lombard et al. 2009 | <i>G. siphonifera</i>     | -          | 27.8         | 347           | 2.17E+07                         | 1340                                                                               | 1340.00                                                                                        | 3.13                     |
| Burke et al. 2025   | <i>G. menardii</i>        | -          | 26           | 432           | 7.60E+06                         | 1100                                                                               | 1717.80                                                                                        | 3.23                     |
| Burke et al. 2025   | <i>G. menardii</i>        | -          | 26           | 478           | 8.43E+06                         | 1500                                                                               | 2112.76                                                                                        | 3.32                     |
| Burke et al. 2025   | <i>G. menardii</i>        | -          | 26           | 490           | 5.47E+06                         | 3700                                                                               | 8031.13                                                                                        | 3.90                     |
| Burke et al. 2025   | <i>G. menardii</i>        | -          | 26           | 556           | 1.05E+07                         | 1900                                                                               | 2147.31                                                                                        | 3.33                     |
| Burke et al. 2025   | <i>G. menardii</i>        | -          | 26           | 572           | 1.23E+07                         | 2200                                                                               | 2126.60                                                                                        | 3.33                     |
| Burke et al. 2025   | <i>G. menardii</i>        | -          | 26           | 637           | 1.69E+07                         | 1600                                                                               | 1122.68                                                                                        | 3.05                     |
| Burke et al. 2025   | <i>G. menardii</i>        | -          | 26           | 755           | 2.19E+07                         | 800                                                                                | 433.73                                                                                         | 2.64                     |
| Burke et al. 2025   | <i>H. pelagica</i>        | -          | 21           | 629           | 4.48E+07                         | 2565.43                                                                            | 2565.43                                                                                        | 3.41                     |
| Burke et al. 2025   | <i>P. obliquiloculata</i> | -          | 26           | 337           | 7.58E+06                         | 1400                                                                               | 4799.40                                                                                        | 3.68                     |
| Burke et al. 2025   | <i>P. obliquiloculata</i> | -          | 26           | 444           | 2.66E+07                         | 3700                                                                               | 3614.88                                                                                        | 3.56                     |
| Burke et al. 2025   | <i>P. obliquiloculata</i> | -          | 26           | 534           | 4.38E+07                         | 3300                                                                               | 1958.75                                                                                        | 3.29                     |

**Table S12:** Source Data for Figure 8 (a, b, and c)

| Source     | Species            | Stat. /Lab | Temp<br>[°C] | Max Ø<br>[µm] | Bio volume<br>[µm <sup>3</sup> ] | Log10 (4 °C)<br>[pmol O <sub>2</sub> h <sup>-1</sup> ] | Log10 (15 °C) | Log10 (24 °C) |
|------------|--------------------|------------|--------------|---------------|----------------------------------|--------------------------------------------------------|---------------|---------------|
| This Study | <i>N. incompta</i> | S1         | 13           | 205           | 1.50E+06                         | 2.00                                                   | 2.62          | 3.13          |
| This Study | <i>N. incompta</i> | S1         | 13           | 230           | 2.12E+06                         | 1.89                                                   | 2.52          | 3.03          |
| This Study | <i>N. incompta</i> | S1         | 13           | 242           | 2.47E+06                         | 2.05                                                   | 2.68          | 3.19          |
| This Study | <i>N. incompta</i> | S1         | 13           | 260           | 3.06E+06                         | 2.10                                                   | 2.73          | 3.24          |
| This Study | <i>N. incompta</i> | S1         | 13           | 273           | 3.55E+06                         | 1.98                                                   | 2.61          | 3.12          |
| This Study | <i>N. incompta</i> | S1         | 13           | 286           | 4.08E+06                         | 2.07                                                   | 2.69          | 3.20          |
| This Study | <i>N. incompta</i> | S16        | 10           | 211           | 1.63E+06                         | 1.64                                                   | 2.27          | 2.78          |
| This Study | <i>N. incompta</i> | S16        | 10           | 226           | 2.01E+06                         | 1.73                                                   | 2.36          | 2.87          |
| This Study | <i>N. incompta</i> | S16        | 10           | 228           | 2.06E+06                         | 1.96                                                   | 2.58          | 3.10          |
| This Study | <i>N. incompta</i> | S16        | 10           | 232           | 2.17E+06                         | 1.64                                                   | 2.26          | 2.77          |
| This Study | <i>N. incompta</i> | S16        | 10           | 238           | 2.35E+06                         | 1.62                                                   | 2.25          | 2.76          |
| This Study | <i>N. incompta</i> | S16        | 10           | 238           | 2.35E+06                         | 1.90                                                   | 2.52          | 3.03          |
| This Study | <i>N. incompta</i> | S16        | 10           | 241           | 2.44E+06                         | 1.83                                                   | 2.46          | 2.97          |

| Source     | Species              | Stat.<br>/Lab | Temp | Max<br>Ø | Bio<br>volume      | Log10<br>(4 °C) | Log10<br>(15 °C)                       | Log10<br>(24 °C) |
|------------|----------------------|---------------|------|----------|--------------------|-----------------|----------------------------------------|------------------|
|            |                      |               | [C]  | [µm]     | [µm <sup>3</sup> ] |                 | [pmol O <sub>2</sub> h <sup>-1</sup> ] |                  |
| This Study | <i>N. incompta</i>   | S16           | 10   | 255      | 2.89E+06           | 1.97            | 2.60                                   | 3.11             |
| This Study | <i>N. incompta</i>   | S20           | 14   | 180      | 1.01E+06           | 1.59            | 2.22                                   | 2.73             |
| This Study | <i>N. incompta</i>   | S20           | 14   | 181      | 1.03E+06           | 1.61            | 2.23                                   | 2.74             |
| This Study | <i>N. incompta</i>   | S20           | 14   | 194      | 1.27E+06           | 1.72            | 2.35                                   | 2.86             |
| This Study | <i>N. incompta</i>   | S20           | 14   | 211      | 1.63E+06           | 1.70            | 2.32                                   | 2.83             |
| This Study | <i>N. incompta</i>   | S20           | 14   | 239      | 2.38E+06           | 1.69            | 2.31                                   | 2.82             |
| This Study | <i>N. incompta</i>   | S20           | 14   | 254      | 2.85E+06           | 1.84            | 2.47                                   | 2.98             |
| This Study | <i>N. incompta</i>   | S20           | 14   | 266      | 3.28E+06           | 1.85            | 2.47                                   | 2.98             |
| This Study | <i>N. incompta</i>   | S20           | 14   | 270      | 3.43E+06           | 1.79            | 2.41                                   | 2.93             |
| This Study | <i>N. incompta</i>   | S20           | 14   | 271      | 3.47E+06           | 1.82            | 2.45                                   | 2.96             |
| This Study | <i>N. incompta</i>   | S20           | 14   | 278      | 3.75E+06           | 1.81            | 2.43                                   | 2.94             |
| This Study | <i>N. incompta</i>   | S20           | 14   | 287      | 4.12E+06           | 1.88            | 2.50                                   | 3.01             |
| This Study | <i>N. pachyderma</i> | Lab           | 2    | 179      | 9.96E+05           | 1.49            | 1.68                                   | 1.83             |
| This Study | <i>N. pachyderma</i> | Lab           | 2    | 190      | 1.19E+06           | 1.39            | 1.58                                   | 1.73             |
| This Study | <i>N. pachyderma</i> | Lab           | 2    | 190      | 1.19E+06           | 1.81            | 2.00                                   | 2.15             |
| This Study | <i>N. pachyderma</i> | Lab           | 2    | 207      | 1.54E+06           | 1.69            | 1.88                                   | 2.03             |
| This Study | <i>N. pachyderma</i> | Lab           | 2    | 260      | 3.06E+06           | 2.01            | 2.20                                   | 2.35             |
| This Study | <i>N. pachyderma</i> | Lab           | 2    | 264      | 3.21E+06           | 1.88            | 2.06                                   | 2.22             |
| This Study | <i>N. pachyderma</i> | Lab           | 2    | 270      | 3.43E+06           | 2.11            | 2.30                                   | 2.45             |
| This Study | <i>N. pachyderma</i> | Lab           | 2    | 317      | 5.56E+06           | 2.19            | 2.38                                   | 2.53             |
| This Study | <i>N. pachyderma</i> | Lab           | 5    | 126      | 3.46E+05           | 1.08            | 1.27                                   | 1.43             |
| This Study | <i>N. pachyderma</i> | Lab           | 5    | 150      | 5.85E+05           | 1.52            | 1.70                                   | 1.86             |
| This Study | <i>N. pachyderma</i> | Lab           | 5    | 160      | 7.10E+05           | 1.33            | 1.52                                   | 1.67             |
| This Study | <i>N. pachyderma</i> | Lab           | 5    | 181      | 1.03E+06           | 1.64            | 1.83                                   | 1.98             |
| This Study | <i>N. pachyderma</i> | Lab           | 5    | 190      | 1.19E+06           | 1.59            | 1.77                                   | 1.93             |
| This Study | <i>N. pachyderma</i> | Lab           | 5    | 190      | 1.19E+06           | 1.69            | 1.87                                   | 2.03             |
| This Study | <i>N. pachyderma</i> | Lab           | 5    | 198      | 1.35E+06           | 1.56            | 1.75                                   | 1.90             |
| This Study | <i>N. pachyderma</i> | Lab           | 5    | 203      | 1.45E+06           | 1.57            | 1.75                                   | 1.91             |
| This Study | <i>N. pachyderma</i> | Lab           | 5    | 205      | 1.50E+06           | 1.75            | 1.94                                   | 2.09             |
| This Study | <i>N. pachyderma</i> | Lab           | 5    | 208      | 1.56E+06           | 1.75            | 1.94                                   | 2.09             |
| This Study | <i>N. pachyderma</i> | Lab           | 5    | 217      | 1.78E+06           | 1.91            | 2.10                                   | 2.25             |
| This Study | <i>N. pachyderma</i> | Lab           | 5    | 218      | 1.80E+06           | 1.75            | 1.94                                   | 2.09             |
| This Study | <i>N. pachyderma</i> | Lab           | 5    | 223      | 1.93E+06           | 1.66            | 1.85                                   | 2.00             |
| This Study | <i>N. pachyderma</i> | Lab           | 5    | 229      | 2.09E+06           | 1.94            | 2.13                                   | 2.28             |
| This Study | <i>N. pachyderma</i> | Lab           | 5    | 233      | 2.20E+06           | 1.93            | 2.12                                   | 2.27             |
| This Study | <i>N. pachyderma</i> | Lab           | 5    | 234      | 2.23E+06           | 1.91            | 2.10                                   | 2.25             |
| This Study | <i>N. pachyderma</i> | Lab           | 5    | 247      | 2.62E+06           | 1.87            | 2.06                                   | 2.21             |
| This Study | <i>N. pachyderma</i> | Lab           | 5    | 283      | 3.95E+06           | 2.18            | 2.37                                   | 2.52             |
| This Study | <i>N. pachyderma</i> | Lab           | 5    | 298      | 4.62E+06           | 2.05            | 2.24                                   | 2.39             |
| This Study | <i>N. pachyderma</i> | Lab           | 8    | 110      | 2.29E+05           | 1.46            | 1.65                                   | 1.80             |
| This Study | <i>N. pachyderma</i> | Lab           | 8    | 117      | 2.76E+05           | 1.55            | 1.74                                   | 1.89             |
| This Study | <i>N. pachyderma</i> | Lab           | 8    | 122      | 3.14E+05           | 1.45            | 1.64                                   | 1.79             |
| This Study | <i>N. pachyderma</i> | Lab           | 8    | 133      | 4.07E+05           | 1.47            | 1.65                                   | 1.81             |
| This Study | <i>N. pachyderma</i> | Lab           | 8    | 137      | 4.45E+05           | 1.36            | 1.54                                   | 1.70             |
| This Study | <i>N. pachyderma</i> | Lab           | 8    | 138      | 4.55E+05           | 1.53            | 1.71                                   | 1.87             |
| This Study | <i>N. pachyderma</i> | Lab           | 8    | 142      | 4.96E+05           | 1.74            | 1.92                                   | 2.08             |
| This Study | <i>N. pachyderma</i> | Lab           | 8    | 151      | 5.97E+05           | 1.52            | 1.70                                   | 1.86             |
| This Study | <i>N. pachyderma</i> | Lab           | 8    | 156      | 6.58E+05           | 1.32            | 1.51                                   | 1.66             |
| This Study | <i>N. pachyderma</i> | Lab           | 8    | 160      | 7.10E+05           | 1.52            | 1.71                                   | 1.86             |
| This Study | <i>N. pachyderma</i> | Lab           | 8    | 163      | 7.51E+05           | 1.65            | 1.84                                   | 1.99             |
| This Study | <i>N. pachyderma</i> | Lab           | 8    | 166      | 7.94E+05           | 1.71            | 1.89                                   | 2.05             |
| This Study | <i>N. pachyderma</i> | Lab           | 8    | 183      | 1.06E+06           | 1.89            | 2.07                                   | 2.23             |
| This Study | <i>N. pachyderma</i> | Lab           | 8    | 190      | 1.19E+06           | 1.93            | 2.11                                   | 2.27             |
| This Study | <i>N. pachyderma</i> | Lab           | 8    | 210      | 1.61E+06           | 1.80            | 1.98                                   | 2.14             |
| This Study | <i>N. pachyderma</i> | Lab           | 13   | 120      | 2.98E+05           | 1.51            | 1.70                                   | 1.85             |
| This Study | <i>N. pachyderma</i> | Lab           | 13   | 123      | 3.21E+05           | 1.62            | 1.80                                   | 1.96             |
| This Study | <i>N. pachyderma</i> | Lab           | 13   | 155      | 6.45E+05           | 1.79            | 1.98                                   | 2.14             |
| This Study | <i>N. pachyderma</i> | Lab           | 13   | 157      | 6.71E+05           | 1.70            | 1.89                                   | 2.04             |

| Source     | Species              | Stat.<br>/Lab | Temp | Max<br>Ø | Bio<br>volume      | Log10<br>(4 °C) | Log10<br>(15 °C)                       | Log10<br>(24 °C) |
|------------|----------------------|---------------|------|----------|--------------------|-----------------|----------------------------------------|------------------|
|            |                      |               | [°C] | [µm]     | [µm <sup>3</sup> ] |                 | [pmol O <sub>2</sub> h <sup>-1</sup> ] |                  |
| This Study | <i>N. pachyderma</i> | Lab           | 13   | 160      | 7.10E+05           | 1.83            | 2.01                                   | 2.17             |
| This Study | <i>N. pachyderma</i> | S2            | 1    | 176      | 9.46E+05           | 1.81            | 2.00                                   | 2.15             |
| This Study | <i>N. pachyderma</i> | S2            | 1    | 178      | 9.79E+05           | 1.60            | 1.78                                   | 1.94             |
| This Study | <i>N. pachyderma</i> | S2            | 1    | 189      | 1.17E+06           | 1.64            | 1.83                                   | 1.98             |
| This Study | <i>N. pachyderma</i> | S2            | 1    | 197      | 1.33E+06           | 1.56            | 1.74                                   | 1.90             |
| This Study | <i>N. pachyderma</i> | S2            | 1    | 199      | 1.37E+06           | 1.64            | 1.82                                   | 1.98             |
| This Study | <i>N. pachyderma</i> | S2            | 1    | 204      | 1.48E+06           | 1.85            | 2.04                                   | 2.19             |
| This Study | <i>N. pachyderma</i> | S2            | 1    | 211      | 1.63E+06           | 1.88            | 2.07                                   | 2.22             |
| This Study | <i>N. pachyderma</i> | S2            | 1    | 214      | 1.70E+06           | 1.69            | 1.87                                   | 2.03             |
| This Study | <i>N. pachyderma</i> | S2            | 1    | 217      | 1.78E+06           | 1.83            | 2.01                                   | 2.17             |
| This Study | <i>N. pachyderma</i> | S8.1          | 3.5  | 151      | 5.97E+05           | 1.45            | 1.64                                   | 1.79             |
| This Study | <i>N. pachyderma</i> | S8.1          | 3.5  | 175      | 9.30E+05           | 1.64            | 1.83                                   | 1.98             |
| This Study | <i>N. pachyderma</i> | S8.1          | 3.5  | 197      | 1.33E+06           | 1.88            | 2.07                                   | 2.22             |
| This Study | <i>N. pachyderma</i> | S8.1          | 3.5  | 211      | 1.63E+06           | 1.78            | 1.97                                   | 2.12             |
| This Study | <i>N. pachyderma</i> | S8.1          | 3.5  | 216      | 1.75E+06           | 1.92            | 2.11                                   | 2.27             |
| This Study | <i>N. pachyderma</i> | S8.1          | 3.5  | 219      | 1.83E+06           | 1.81            | 2.00                                   | 2.15             |
| This Study | <i>N. pachyderma</i> | S10           | 0.5  | 262      | 3.13E+06           | 1.37            | 1.56                                   | 1.71             |
| This Study | <i>N. pachyderma</i> | S10           | 0.5  | 270      | 3.43E+06           | 1.46            | 1.64                                   | 1.80             |
| This Study | <i>N. pachyderma</i> | S10           | 0.5  | 303      | 4.85E+06           | 1.32            | 1.50                                   | 1.66             |
| This Study | <i>N. pachyderma</i> | S10           | 0.5  | 305      | 4.95E+06           | 1.42            | 1.61                                   | 1.76             |
| This Study | <i>N. pachyderma</i> | S11           | 2.5  | 250      | 2.72E+06           | 1.52            | 1.71                                   | 1.86             |
| This Study | <i>N. pachyderma</i> | S11           | 2.5  | 294      | 4.43E+06           | 1.89            | 2.08                                   | 2.23             |
| This Study | <i>N. pachyderma</i> | S12           | 10   | 210      | 1.61E+06           | 1.65            | 1.84                                   | 1.99             |
| This Study | <i>N. pachyderma</i> | S12           | 10   | 222      | 1.90E+06           | 1.49            | 1.67                                   | 1.83             |
| This Study | <i>N. pachyderma</i> | S12           | 10   | 234      | 2.23E+06           | 1.74            | 1.92                                   | 2.08             |
| This Study | <i>N. pachyderma</i> | S12           | 10   | 244      | 2.53E+06           | 1.57            | 1.75                                   | 1.91             |
| This Study | <i>N. pachyderma</i> | S12           | 10   | 248      | 2.66E+06           | 1.49            | 1.67                                   | 1.83             |
| This Study | <i>N. pachyderma</i> | S12           | 10   | 279      | 3.79E+06           | 1.55            | 1.74                                   | 1.89             |
| This Study | <i>N. pachyderma</i> | S12           | 10   | 282      | 3.91E+06           | 1.70            | 1.89                                   | 2.04             |
| This Study | <i>N. pachyderma</i> | S12           | 10   | 308      | 5.10E+06           | 1.65            | 1.83                                   | 1.99             |
| This Study | <i>N. pachyderma</i> | S16           | 10   | 185      | 1.10E+06           | 1.35            | 1.54                                   | 1.69             |
| This Study | <i>N. pachyderma</i> | S16           | 10   | 187      | 1.14E+06           | 1.74            | 1.93                                   | 2.08             |
| This Study | <i>N. pachyderma</i> | S17           | 6    | 149      | 5.73E+05           | 1.54            | 1.73                                   | 1.88             |
| This Study | <i>N. pachyderma</i> | S17           | 6    | 164      | 7.65E+05           | 1.50            | 1.69                                   | 1.84             |
| This Study | <i>N. pachyderma</i> | S17           | 6    | 179      | 9.96E+05           | 1.51            | 1.70                                   | 1.85             |
| This Study | <i>N. pachyderma</i> | S17           | 6    | 179      | 9.96E+05           | 1.93            | 2.12                                   | 2.27             |
| This Study | <i>N. pachyderma</i> | S17           | 6    | 187      | 1.14E+06           | 1.55            | 1.74                                   | 1.89             |
| This Study | <i>N. pachyderma</i> | S17           | 6    | 199      | 1.37E+06           | 1.43            | 1.61                                   | 1.77             |
| This Study | <i>N. pachyderma</i> | S17           | 6    | 199      | 1.37E+06           | 1.96            | 2.15                                   | 2.30             |
| This Study | <i>N. pachyderma</i> | S17           | 6    | 200      | 1.39E+06           | 1.63            | 1.82                                   | 1.97             |
| This Study | <i>N. pachyderma</i> | S17           | 6    | 206      | 1.52E+06           | 1.71            | 1.89                                   | 2.05             |
| This Study | <i>N. pachyderma</i> | S17           | 6    | 206      | 1.52E+06           | 1.83            | 2.02                                   | 2.17             |
| This Study | <i>N. pachyderma</i> | S17           | 6    | 207      | 1.54E+06           | 1.62            | 1.81                                   | 1.96             |
| This Study | <i>N. pachyderma</i> | S17           | 6    | 225      | 1.98E+06           | 1.97            | 2.16                                   | 2.31             |
| This Study | <i>N. pachyderma</i> | S17           | 6    | 238      | 2.35E+06           | 2.01            | 2.19                                   | 2.35             |
| This Study | <i>N. pachyderma</i> | S17           | 6    | 243      | 2.50E+06           | 1.91            | 2.09                                   | 2.25             |
| This Study | <i>N. pachyderma</i> | S17           | 6    | 251      | 2.75E+06           | 1.66            | 1.85                                   | 2.00             |
| This Study | <i>N. pachyderma</i> | S17           | 6    | 266      | 3.28E+06           | 1.95            | 2.14                                   | 2.30             |
| This Study | <i>N. pachyderma</i> | S17           | 6    | 269      | 3.39E+06           | 2.02            | 2.21                                   | 2.36             |
| This Study | <i>N. pachyderma</i> | S18           | 7.5  | 154      | 6.33E+05           | 1.51            | 1.69                                   | 1.85             |
| This Study | <i>N. pachyderma</i> | S18           | 7.5  | 178      | 9.79E+05           | 1.63            | 1.81                                   | 1.97             |
| This Study | <i>N. pachyderma</i> | S18           | 7.5  | 199      | 1.37E+06           | 1.75            | 1.94                                   | 2.09             |
| This Study | <i>N. pachyderma</i> | S18           | 7.5  | 217      | 1.78E+06           | 1.80            | 1.99                                   | 2.14             |
| This Study | <i>N. pachyderma</i> | S18           | 7.5  | 228      | 2.06E+06           | 1.67            | 1.86                                   | 2.01             |
| This Study | <i>N. pachyderma</i> | S19           | 6    | 248      | 2.66E+06           | 1.75            | 1.94                                   | 2.09             |
| This Study | <i>N. pachyderma</i> | S19           | 6    | 224      | 1.96E+06           | 1.81            | 2.00                                   | 2.15             |
| This Study | <i>N. pachyderma</i> | S19           | 6    | 160      | 7.10E+05           | 1.82            | 2.00                                   | 2.16             |
| This Study | <i>N. pachyderma</i> | S19           | 6    | 205      | 1.50E+06           | 1.68            | 1.87                                   | 2.02             |

| Source              | Species               | Stat.<br>/Lab | Temp | Max<br>Ø | Bio<br>volume      | Log10<br>(4 °C) | Log10<br>(15 °C)                       | Log10<br>(24 °C) |
|---------------------|-----------------------|---------------|------|----------|--------------------|-----------------|----------------------------------------|------------------|
|                     |                       |               | [°C] | [µm]     | [µm <sup>3</sup> ] |                 | [pmol O <sub>2</sub> h <sup>-1</sup> ] |                  |
| This Study          | <i>N. pachyderma</i>  | S19           | 6    | 299      | 4.66E+06           | 1.82            | 2.01                                   | 2.16             |
| This Study          | <i>N. pachyderma</i>  | S19           | 6    | 307      | 5.05E+06           | 2.02            | 2.20                                   | 2.36             |
| This Study          | <i>N. pachyderma</i>  | S19           | 6    | 200      | 1.39E+06           | 1.69            | 1.88                                   | 2.03             |
| This Study          | <i>N. pachyderma</i>  | S19           | 6    | 221      | 1.88E+06           | 1.90            | 2.09                                   | 2.24             |
| This Study          | <i>N. pachyderma</i>  | S19           | 6    | 243      | 2.50E+06           | 1.83            | 2.02                                   | 2.17             |
| This Study          | <i>N. pachyderma</i>  | S19           | 6    | 186      | 1.12E+06           | 1.52            | 1.70                                   | 1.86             |
| This Study          | <i>T. quinqueloba</i> | Lab           | 2    | 162      | 7.37E+05           | 1.06            | 1.77                                   | 2.36             |
| This Study          | <i>T. quinqueloba</i> | Lab           | 2    | 194      | 1.27E+06           | 1.23            | 1.94                                   | 2.52             |
| This Study          | <i>T. quinqueloba</i> | Lab           | 2    | 216      | 1.75E+06           | 1.52            | 2.23                                   | 2.81             |
| This Study          | <i>T. quinqueloba</i> | Lab           | 2    | 255      | 2.89E+06           | 1.26            | 1.97                                   | 2.56             |
| This Study          | <i>T. quinqueloba</i> | Lab           | 5    | 140      | 4.75E+05           | 1.34            | 2.05                                   | 2.63             |
| This Study          | <i>T. quinqueloba</i> | Lab           | 5    | 178      | 9.79E+05           | 1.14            | 1.85                                   | 2.44             |
| This Study          | <i>T. quinqueloba</i> | Lab           | 5    | 178      | 9.79E+05           | 1.19            | 1.90                                   | 2.48             |
| This Study          | <i>T. quinqueloba</i> | Lab           | 5    | 189      | 1.17E+06           | 1.09            | 1.80                                   | 2.38             |
| This Study          | <i>T. quinqueloba</i> | Lab           | 5    | 195      | 1.29E+06           | 1.71            | 2.42                                   | 3.00             |
| This Study          | <i>T. quinqueloba</i> | Lab           | 5    | 208      | 1.56E+06           | 1.46            | 2.17                                   | 2.75             |
| This Study          | <i>T. quinqueloba</i> | Lab           | 5    | 214      | 1.70E+06           | 1.42            | 2.13                                   | 2.71             |
| This Study          | <i>T. quinqueloba</i> | Lab           | 5    | 228      | 2.06E+06           | 1.46            | 2.17                                   | 2.75             |
| This Study          | <i>T. quinqueloba</i> | Lab           | 5    | 230      | 2.12E+06           | 1.58            | 2.29                                   | 2.87             |
| This Study          | <i>T. quinqueloba</i> | Lab           | 5    | 232      | 2.17E+06           | 1.45            | 2.16                                   | 2.75             |
| This Study          | <i>T. quinqueloba</i> | Lab           | 8    | 161      | 7.24E+05           | 1.31            | 2.02                                   | 2.60             |
| This Study          | <i>T. quinqueloba</i> | Lab           | 8    | 199      | 1.37E+06           | 1.40            | 2.11                                   | 2.70             |
| This Study          | <i>T. quinqueloba</i> | Lab           | 8    | 205      | 1.50E+06           | 1.37            | 2.09                                   | 2.67             |
| This Study          | <i>T. quinqueloba</i> | Lab           | 8    | 209      | 1.59E+06           | 1.28            | 1.99                                   | 2.57             |
| This Study          | <i>T. quinqueloba</i> | Lab           | 13   | 154      | 6.33E+05           | 1.32            | 2.03                                   | 2.61             |
| This Study          | <i>T. quinqueloba</i> | Lab           | 13   | 182      | 1.05E+06           | 1.14            | 1.85                                   | 2.43             |
| This Study          | <i>T. quinqueloba</i> | Lab           | 13   | 197      | 1.33E+06           | 1.53            | 2.24                                   | 2.82             |
| This Study          | <i>T. quinqueloba</i> | Lab           | 13   | 210      | 1.61E+06           | 1.29            | 2.00                                   | 2.58             |
| This Study          | <i>T. quinqueloba</i> | Lab           | 13   | 219      | 1.83E+06           | 1.20            | 1.91                                   | 2.50             |
| Rink et al. 1998    | <i>O. universa</i>    | -             | 21   | 297      | 1.53E+07           | 2.38            | 2.93                                   | 3.39             |
| Rink et al. 1998    | <i>O. universa</i>    | -             | 21.5 | 473      | 4.48E+07           | 2.35            | 2.91                                   | 3.36             |
| Rink et al. 1998    | <i>O. universa</i>    | -             | 22   | 463      | 4.25E+07           | 2.77            | 3.32                                   | 3.77             |
| Rink et al. 1998    | <i>O. universa</i>    | -             | 23   | 554      | 6.60E+07           | 2.82            | 3.37                                   | 3.82             |
| Rink et al. 1998    | <i>O. universa</i>    | -             | 23.5 | 554      | 6.60E+07           | 2.73            | 3.29                                   | 3.74             |
| Lombard et al. 2009 | <i>O. universa</i>    | -             | 15.3 | 521      | 7.40E+07           | 1.98            | 2.53                                   | 2.98             |
| Lombard et al. 2009 | <i>O. universa</i>    | -             | 19.9 | 521      | 7.40E+07           | 1.98            | 2.53                                   | 2.98             |
| Lombard et al. 2009 | <i>O. universa</i>    | -             | 24.3 | 521      | 7.40E+07           | 2.01            | 2.57                                   | 3.02             |
| Lombard et al. 2009 | <i>O. universa</i>    | -             | 29.3 | 521      | 7.40E+07           | 2.01            | 2.56                                   | 3.01             |
| Burke et al. 2025   | <i>O. universa</i>    | -             | 21   | 670      | 9.30E+07           | 2.89            | 3.45                                   | 3.90             |
| Burke et al. 2025   | <i>G. ruber</i>       | -             | 21   | 338      | 5.40E+06           | 2.45            | 3.00                                   | 3.45             |
| Burke et al. 2025   | <i>G. ruber</i>       | -             | 21   | 361      | 9.65E+06           | 1.98            | 2.53                                   | 2.98             |
| Burke et al. 2025   | <i>G. ruber</i>       | -             | 21   | 384      | 1.55E+07           | 2.45            | 3.00                                   | 3.45             |
| Burke et al. 2025   | <i>G. ruber</i>       | -             | 21   | 526      | 3.66E+07           | 1.95            | 2.50                                   | 2.95             |
| Burke et al. 2025   | <i>G. ruber</i>       | -             | 24   | 230      | 2.30E+06           | 2.03            | 2.58                                   | 3.04             |
| Burke et al. 2025   | <i>G. ruber</i>       | -             | 24   | 277      | 4.60E+06           | 1.50            | 2.06                                   | 2.51             |
| Lombard et al. 2009 | <i>G. ruber</i>       | -             | 17.3 | 189      | 6.13E+06           | 1.51            | 2.06                                   | 2.51             |
| Lombard et al. 2009 | <i>G. ruber</i>       | -             | 19.4 | 249      | 1.06E+07           | 1.51            | 2.06                                   | 2.51             |
| Lombard et al. 2009 | <i>G. ruber</i>       | -             | 21.6 | 189      | 6.13E+06           | 1.39            | 1.95                                   | 2.40             |
| Lombard et al. 2009 | <i>G. ruber</i>       | -             | 24.1 | 189      | 6.13E+06           | 1.62            | 2.18                                   | 2.63             |
| Lombard et al. 2009 | <i>G. ruber</i>       | -             | 24.1 | 241      | 9.88E+06           | 1.51            | 2.06                                   | 2.51             |
| Lombard et al. 2009 | <i>G. ruber</i>       | -             | 24.2 | 249      | 1.06E+07           | 1.66            | 2.21                                   | 2.66             |
| Lombard et al. 2009 | <i>G. ruber</i>       | -             | 29.5 | 249      | 1.06E+07           | 1.54            | 2.10                                   | 2.55             |
| Lombard et al. 2009 | <i>G. ruber</i>       | -             | 29.6 | 241      | 9.88E+06           | 1.51            | 2.06                                   | 2.51             |
| Lombard et al. 2009 | <i>G. siphonifera</i> | -             | 18.7 | 347      | 2.17E+07           | 2.09            | 2.64                                   | 3.09             |
| Lombard et al. 2009 | <i>G. siphonifera</i> | -             | 24.3 | 347      | 2.17E+07           | 1.89            | 2.45                                   | 2.90             |
| Lombard et al. 2009 | <i>G. siphonifera</i> | -             | 27.8 | 347      | 2.17E+07           | 1.93            | 2.48                                   | 2.94             |
| Burke et al. 2025   | <i>G. menardii</i>    | -             | 26   | 432      | 7.60E+06           | 1.94            | 2.49                                   | 2.94             |
| Burke et al. 2025   | <i>G. menardii</i>    | -             | 26   | 478      | 8.43E+06           | 2.07            | 2.62                                   | 3.08             |

| Source            | Species                   | Stat.<br>/Lab | Temp | Max<br>Ø | Bio<br>volume      | Log10<br>(4 °C)                        | Log10<br>(15 °C) | Log10<br>(24 °C) |
|-------------------|---------------------------|---------------|------|----------|--------------------|----------------------------------------|------------------|------------------|
|                   |                           |               | [°C] | [µm]     | [µm <sup>3</sup> ] | [pmol O <sub>2</sub> h <sup>-1</sup> ] |                  |                  |
| Burke et al. 2025 | <i>G. menardii</i>        | -             | 26   | 490      | 5.47E+06           | 2.46                                   | 3.02             | 3.47             |
| Burke et al. 2025 | <i>G. menardii</i>        | -             | 26   | 556      | 1.05E+07           | 2.17                                   | 2.73             | 3.18             |
| Burke et al. 2025 | <i>G. menardii</i>        | -             | 26   | 572      | 1.23E+07           | 2.24                                   | 2.79             | 3.24             |
| Burke et al. 2025 | <i>G. menardii</i>        | -             | 26   | 637      | 1.69E+07           | 2.10                                   | 2.65             | 3.10             |
| Burke et al. 2025 | <i>G. menardii</i>        | -             | 26   | 755      | 2.19E+07           | 1.80                                   | 2.35             | 2.80             |
| Burke et al. 2025 | <i>H. pelagica</i>        | -             | 21   | 629      | 4.48E+07           | 2.56                                   | 3.11             | 3.56             |
| Burke et al. 2025 | <i>P. obliquiloculata</i> | -             | 26   | 337      | 7.58E+06           | 2.04                                   | 2.59             | 3.05             |
| Burke et al. 2025 | <i>P. obliquiloculata</i> | -             | 26   | 444      | 2.66E+07           | 2.46                                   | 3.02             | 3.47             |
| Burke et al. 2025 | <i>P. obliquiloculata</i> | -             | 26   | 534      | 4.38E+07           | 2.41                                   | 2.97             | 3.42             |
